1 **Microglia are involved in regulating histamine dependent and non-dependent**  
2 **itch transmissions with distinguished signal pathways**

3 Yuxiu Yang<sup>1, 2</sup>, Bin Mou<sup>1, 2</sup>, Qi-Ruo Zhang<sup>2</sup>, Hong-Xue Zhao<sup>1, 2</sup>, Jian-Yun  
4 Zhang<sup>2</sup>, Xiao Yun<sup>2</sup>, Ming-Tao Xiong<sup>2</sup>, Ying Liu<sup>2</sup>, Yong U. Liu<sup>4</sup>, Haili Pan<sup>2</sup>,  
5 Chao-Lin Ma<sup>2</sup>, Bao-Ming Li<sup>2, 3</sup>, Jiyun Peng<sup>1, 2\*</sup>

6

7 <sup>1</sup>School of Basic Medical Sciences, Nanchang University, Nanchang, 330031,  
8 China

9 <sup>2</sup>Institute of Life Science, Nanchang University, Nanchang, 330031, China

10 <sup>3</sup>Department of Physiology and Institute of Brain Science, School of Basic  
11 Medical Sciences, Hangzhou Normal University, Hangzhou, 311121, China

12 <sup>4</sup>Laboratory for Neuroimmunology in Health and Disease, Guangzhou First  
13 People's Hospital, School of Medicine, South China University of Technology,  
14 Guangzhou, 510180, China

15

16 \*Correspondence:

17 Dr. Jiyun Peng

18 Center for Neuropsychiatric Disorders, Institute of Life Science

19 Nanchang University

20 999 Xuefu Road, Honggutan New district,

21 Nanchang, Jiangxi Province, 330031

22 China

23 Tel: +86-791-8382-7283

24 E-MAIL: pengjy@ncu.edu.cn

25

26

27     **Abstract**

28             Although itch and pain have many similarities, they are completely different in  
29     perceptual experience and behavioral response. In recent years, we have a deep  
30     understanding of the neural pathways of itch sensation transmission. However, there  
31     are few reports on the role of non-neuronal cells in itch. Microglia are known to play a  
32     key role in chronic neuropathic pain and acute inflammatory pain. It is still unknown  
33     whether microglia are also involved in regulating the transmission of itch sensation.  
34     In the present study, we used several kinds of transgenic mice to specifically deplete  
35     CX3CR1+ central microglia and peripheral macrophages together (whole depletion),  
36     or selectively deplete central microglia alone (central depletion). We observed that  
37     the acute itch responses to histamine, compound 48/80 and chloroquine were all  
38     significantly reduced in mice with either whole or central depletion. Spinal c-fos  
39     mRNA assay and further studies revealed that histamine and compound 48/80, but  
40     not chloroquine elicited primary itch signal transmission from DRG to spinal Npr1-  
41     and somatostatin-positive neurons relied on microglial CX3CL1-CX3CR1 pathway.  
42     Our results suggested that central microglia were involved in multiple types of acute  
43     chemical itch transmission, while the underlying mechanisms for histamine  
44     dependent and non-dependent itch transmission were different that the former  
45     required the CX3CL1-CX3CR1 signal pathway.  
46

## 47 **Introduction**

48 Pruritoceptive itch is an unpleasant sensation that is initiated from the skin and  
49 elicits a desire to scratch (Yosipovitch et al., 2003). Many kinds of stimuli upon or  
50 beneath skin can evoke itch sensation, such as a slight mechanical stroke, particular  
51 types of chemicals and inflammation induced cytokines. Histamine (HA) is one of the  
52 most well-known itch mediators that act on H1 and H4 receptors at the free-ending of  
53 pruriceptive nerve fibers (Dong and Dong, 2018; Kashiba et al., 1999; Strakhova et  
54 al., 2009). There are also several kinds of non-histamine itch mediators that used on  
55 laboratory animal studies, such as chloroquine (CQ), serotonin (5-HT),  $\beta$ -alanine and  
56 so on (Dong and Dong, 2018). Similar as pain sensation, chemical itch signals are  
57 known to be conveyed by unmyelinated C fibers (Ringkamp et al., 2011; Schmelz et  
58 al., 1997; Shim and Oh, 2008). Different groups of Dorsal Root Ganglion (DRG)  
59 neurons respond to those stimuli. Using single-cell RNA sequencing data, the DRG  
60 neurons could be categorized to 11 subpopulations. Among them, three non-  
61 peptidergic (NP) groups were associated with itch: NP1 expressing MrgprD responds  
62 to  $\beta$ -alanine, NP2 expressing MrgprA3 responds to several kinds of mediators  
63 including CQ, HA and BAM8-22, and NP3 expressing brain natriuretic peptide (BNP)  
64 and somatostatin (SST) responds to HA (Usoskin et al., 2015). Although itch and pain  
65 share some common peripheral afferent pathways and influence each other  
66 (Davidson and Giesler, 2010; Simone et al., 2004), the spinal level transmission  
67 pathways are quite different. Studies have revealed that itch transmission relies more  
68 on neuropeptides release rather than glutamate release from the peripheral neurons  
69 (Liu et al., 2010). Neuropeptides that were found to anticipate in itch signal  
70 transmission includes Gastrin-Releasing Peptide (GRP), Natriuretic Polypeptide B  
71 (NPPB), Neuromedin B (NMB), SST, substance P, et. al. (Akiyama et al., 2014;  
72 Huang et al., 2018; Mishra and Hoon, 2013; Wan et al., 2017).

73 Peripheral immune cells play important roles on chemical pruritogen insult  
74 detection and chronic itch development (Pasparakis et al., 2014). Mast cells are the  
75 major endogenous HA source (Rao and Brown, 2008). Type 2 T helper (Th2) cells,

76 macrophages or dendritic cells and infiltrated monocytes are involved in cytokine  
77 release, including IL-4, IL-13 and IL-31 (Brandt and Sivaprasad, 2011; Nattkemper et  
78 al., 2018; Oetjen et al., 2017). Despite the well-known involvement of immune system  
79 in the periphery, whether immune cells participate in the central transmission of itch  
80 sensation is largely unknown.

81 Microglia are the resident immune cells in the central nerve system (CNS).  
82 Microglia share many properties with peripheral macrophages (e.g., expression of  
83 CX3CR1), but are originated from different source during early development (Gomez  
84 Perdiguero et al., 2015). A bunch of studies have revealed that microglia are one of  
85 the key players in pain hypersensitivity and chronic pain development (Inoue and  
86 Tsuda, 2018; Peng et al., 2016). With peripheral nerve injury, spinal microglia would  
87 be activated by multiple signals, including the fractalkine or CX3CL1 signals, through  
88 CX3CR1 receptors, ATP/ADP signals through purinergic receptors such as P2X4,  
89 P2X7 and P2Y12, and the CSF1 signals. These signal pathways are thought to be  
90 involved in microglial promoting pain hypersensitivities. To study whether microglia  
91 and peripheral resident macrophages are involved in acute itch sensation, and what  
92 is the signal pathway, we used multiple transgenic tools to deplete microglia and  
93 peripheral macrophages together or deplete central microglia alone, and examined  
94 how itch responses that induced by either HA dependent or non-dependent insults  
95 were affected. We demonstrated that central microglia were involved in both HA  
96 dependent and non-dependent (CQ) itch transmission. Further Spinal c-fos mRNA  
97 assay and behavior screening studies with the P2Y12 KO and CX3CR1 KO mice  
98 revealed that the underlying mechanisms for HA dependent and non-dependent itch  
99 transmission are different that the former requires the CX3CL1-CX3CR1 signal  
100 pathway, while the latter does not. The microglial P2Y12 receptors are not involved in  
101 any acute itch signal transmission.

## 102 **Results**

103 **Depletion of CX3CR1+ microglia and macrophages inhibited acute itch**  
104 **responses to HA, C48/80 and CQ**

105 The CX3CR1 fractalkine receptors are highly expressed in central microglia and  
106 peripheral macrophages. To establish an overall effect of CX3CR1+ cell depletion on  
107 acute itch transmission, we first used the CSF1R<sup>fl/fl</sup>;CX3CR1<sup>CreER/+</sup> transgenic mice to  
108 knock out the csf1r gene in all CX3CR1+ cells. Because the CSF1 receptors in  
109 microglia and macrophages are essential for the cell survival (Elmore et al., 2014;  
110 MacDonald et al., 2010), knock out of the gene will cause cell apoptosis. With 3  
111 doses of Tamoxifen (TM, 150 mg/kg, i.p., 48 hr interval) treatment,  $98.4 \pm 1.1\%$  of  
112 microglia in the spinal cord and  $80.6 \pm 2.9\%$  of macrophages in the DRG were  
113 depleted when checked at 24 hr after the last Tamoxifen injection. While in the skin of  
114 the back neck, the number of F4/80+ labeled dendritic cell was not affected (Fig. 1A  
115 and B). Thus, the CSF1R strategy efficiently depleted the central microglia and the  
116 DRG macrophages, but did not affect peripheral dendritic cells.

117 To examine the effect of microglia and macrophage depletion on acute itch  
118 transmission, we first tested the itch responses in the HA model and the HA  
119 dependent compound 48/80 model in the depletion mice and the control CSF1R<sup>fl/fl</sup>  
120 mice that received the same doses of TM treatment. In the HA model, the behavioral  
121 responses ( $19.64 \pm 2.588$  scratch bouts within 30 min) of the depletion mice were  
122 significantly less than that of the control mice ( $51.70 \pm 4.069$  scratch bouts within 30  
123 min, Fig. 1C). The C48/80 is a very strong itching mediator that act on mast cells and  
124 cause degranulation and HA release (McNeil et al., 2015). The scratch responses to  
125 C48/80 were much stronger than that to HA treatment in the normal control mice. The  
126 scratch frequencies were progressively increased after 3 min and reached the peak  
127 within 15 min (Supplementary Fig. 1A). Thus, we separated the total 30 min scratch  
128 responses as early stage(0-3in) and late stage (3-30min). As shown in Fig. 1C, in the  
129 depletion mice, the scratch bouts were significantly decreased in both the early stage  
130 ( $p = 0.040$ ) and the later stage ( $p = 0.00011$ ). The results suggested that the HA  
131 dependent itch responses required the CX3CR1+ cells.

132 We then examined another HA non-dependent model, the CQ model, which  
133 induces strong itch responses. CQ treatment in the normal control mice  
134 characterized by typical two-phase responses. The mice began scratch immediately

135 after the CQ injection and then calmed down briefly in 3 min. After that, the scratch  
136 frequencies increased progressively and reach the peak at around 15 min  
137 (supplementary Fig. 1B). In the depletion mice, as shown in Fig. 1C, the scratch  
138 bouts were significantly less than the control in both the early ( $p = 0.0049$ ) and late ( $p$   
139  $< 0.0001$ ) stages. The results suggested that the non-histamine dependent itch  
140 responses to CQ also required the CX3CR1+ cells.

141 We also examined the itch responses to  $\beta$ -alanine and mechanical stimulus.  $\beta$ -  
142 alanine is a relatively weaker pruritoceptive mediator compared with C48/80 and CQ  
143 that the signal is relayed by the NP1 type DRG neurons. Interesting, the scratch  
144 responses to  $\beta$ -alanine injection to neck skin in the depletion mice were comparable  
145 to that in the control mice ( $p = 0.834$ ) (Fig. S2A). Therefore,  $\beta$ -alanine induced itch  
146 sensation transmission did not require microglia or macrophages.

147 For the mechanical itch test, the mechanical stimuli on the skin behind ear were  
148 applied using the Von Frey filaments ranged from 0.02 g to 0.4 g. Similar as previous  
149 reported(Pan et al., 2019), the normal control mice were most sensitive to 0.07 g (0.7  
150 N) stimulus. In the depletion mice, the scratch responses to all the tested stimulus  
151 strengths were similar as that in the controls, respectively ( $p = 0.544$  for group effect  
152 with two-way ANOVA, repeated measurement) (Fig. S2B). Therefore, mechanical  
153 stimuli induced itch sensation transmission did not require microglia or macrophages.

154 With the above pruritoceptive reagents screening tests, we concluded that the  
155 CX3CR1+ microglia and/or macrophages were involved in the itch sensation  
156 transmission that elicited by agents depending on HA pathway and the HA non-  
157 dependent agent, CQ. The non-affected itch responses to  $\beta$ -alanine and mechanical  
158 stimuli suggested that the microglia/macrophage depletion did not affect the  
159 behavioral expression of itch responses.

160 To further confirm whether the transient microglia/macrophage depletion affect  
161 the itch transmission pathway in a long term, we did the second tests in the depletion  
162 mice for the HA, C48/80 and CQ model at 14 days after the first test (Recovery group  
163 in Fig. 1). During the 14 days, no further TM was injected. Thus, microglia and  
164 macrophages were repopulated and reached the pre-ablation level (Fig. 1A-B). The

165 results showed that, for all the 3 models, the scratch responses in the mice  
166 recovered from the microglia/macrophages depletion were restored and comparable  
167 to that in the controls, respectively (Fig. 1C). Therefore, the transient  
168 microglia/macrophage depletion would not disrupt itch transmission circuits  
169 permanently.

## 170 **Depletion of central microglia inhibited acute itch responses to HA, C48/80 and** 171 **CQ**

172 Since the CSF1R conditional knockout strategy depleted microglia and  
173 macrophages at the same time, we could not distinguish the role of central microglia  
174 from peripheral macrophages. To dissect the exact role of central microglia in itch  
175 transmission, we used the ROSA<sup>iDTR/+</sup>;CX3CR1<sup>CreER/+</sup> to ablate central microglia alone.  
176 The hematopoietic originated monocytes/macrophages have a quick turn-over rate.  
177 Several weeks after TM treatment, the circulating monocytes and part of tissue  
178 macrophages would be replaced by new cells originated from hematopoietic stem  
179 cells (HSCs). Since HSCs do not express CX3CR1, the new cells would not express  
180 the induced diphtheria toxin receptors (DTR) and not be affected by the diphtheria  
181 toxin treatment (Parkhurst et al., 2013; Peng *et al.*, 2016). Thus, we waited 3 weeks  
182 after the TM treatment (150 mg/kg, i.p., 4 doses with 48 hr interval), then 2 doses of  
183 DT (0.75 µg per mice with 48 hr interval, i.p.) were given. One day after the second  
184 DT injection, 76.3±5.3% of Iba1+ cells in the spinal cord were ablated, while 37.9±  
185 7.5% of Iba1+ cells in the DRG were ablated as well (Fig. 2B). Thus, the central  
186 microglia were efficiently ablated, but the peripheral DRG macrophages were  
187 partially ablated as well.

188 To separate the central microglia from the peripheral macrophages/monocytes  
189 more clearly. We further used the TMEM119-CreER transgenic mouse to generate  
190 the TMEM119<sup>CreER/+</sup>;ROSA<sup>iDTR/+</sup> mice. Tmem119 gene was found to be specifically  
191 expressed in central microglia only (Sato et al., 2016). We confirmed the tmem119  
192 expression pattern with the TMEM119-EGFP mice. The GFP signals were seen in  
193 central microglia cells, but not in DRG macrophages (Fig. S3). With a series of pilot

194 tests, we finally chose a 10-doses TM (150 mg/kg with 48 hr interval, i.p.) injection  
195 protocol to achieve a reliable microglia depletion efficiency. 6 days after the last TM  
196 injection, two doses of DT (0.75  $\mu$ g per mice with 48 hr interval, i.p.) were injected to  
197 ablate microglia cells. As shown in Fig. 2A-B, Iba1+ cells were reduced by  $42.2 \pm 1.8\%$   
198 of control in the spinal cord. Most of the remained microglia cells showed ramified  
199 morphology similar as the WT control, suggesting that those cells were not affected  
200 by DT and the TM induced gene modification was not succeeded in the remained  
201 microglia cells. The Iba1+ cells in the DRG were comparable to that of the control  
202 mice ( $p = 0.716$ ). Therefore, using the TMEM119-CreER tools, we could specifically  
203 manipulate the central microglia without affecting the peripheral macrophages,  
204 although the efficiency was less than that of the CX3CR1-CreER.

205 To examine how the acute itch transmission was affected with central microglia  
206 depletion. We tested the acute itch responses in both the DT treated  
207 ROSA<sup>iDTR/+</sup>;CX3CR1<sup>CreER/+</sup> and ROSA<sup>iDTR/+</sup>;TMEM119<sup>CreER/+</sup> mice (Fig. 2C-D). With HA  
208 treatment, the total scratch bouts within 30 min in the ROSA<sup>iDTR/+</sup>;CX3CR1<sup>CreER/+</sup> ( $p =$   
209 0.017) mice were significantly less than that of the control group, which received the  
210 same doses of TM and DT treatments. With C48/80 treatment, the scratch responses  
211 in the early stage (0-3 min) were not altered in both the ROSA<sup>iDTR/+</sup>;CX3CR1<sup>CreER/+</sup> ( $p$   
212 = 0.775) and ROSA<sup>iDTR/+</sup>;TMEM119<sup>CreER/+</sup> ( $p = 0.085$ ) mice comparing to each control  
213 group, but the scratch responses in the late stage (3-30 min) were significantly  
214 decreased in both the ROSA<sup>iDTR/+</sup>;CX3CR1<sup>CreER/+</sup> ( $p = 0.0007$ ) and  
215 ROSA<sup>iDTR/+</sup>;TMEM119<sup>CreER/+</sup> ( $p = 0.0091$ ) mice comparing to each control group. With  
216 CQ treatment, the scratch responses in the early stage (0-3 min) were significantly  
217 decreased in the ROSA<sup>iDTR/+</sup>;CX3CR1<sup>CreER/+</sup> ( $p = 0.0217$ ) but not  
218 ROSA<sup>iDTR/+</sup>;TMEM119<sup>CreER/+</sup> ( $p = 0.092$ ) mice comparing to each control group, and  
219 the scratch responses in the late stage (3-30 min) were significantly decreased in  
220 both the ROSA<sup>iDTR/+</sup>;CX3CR1<sup>CreER/+</sup> ( $p = 0.0026$ ) and ROSA<sup>iDTR/+</sup>;P2Y12<sup>CreER/CreER</sup> ( $p =$   
221 0.0004) mice comparing to each control group. The results suggested that the central  
222 microglia were involved in the HA dependent and non-dependent (CQ) acute itch  
223 transmission. The different impact on the early-stage responses among the CSF1R



224 depletion strategy and the two kinds of iDTR strategy suggested that the peripheral  
225 macrophages could also contribute to both the HA dependent and non-dependent  
226 acute itch transmission, at least in the early stage.

227 **Microglia were involved in the primary HA, but not CQ itch signal transmission**  
228 **from DRG to spinal cord**

229 To dissect how microglia regulated the neuronal circuits for itch in the spinal level,  
230 we examined the c-fos mRNA expression changes at 90 min after the itch agent  
231 application via RNAscope. The spinal Npr1+ inter-neurons were known to directly  
232 receive both HA dependent and non-dependent itch signals from DRG primary  
233 projection (Mishra and Hoon, 2013). And the spinal Sst+ inter-neurons that relay  
234 inhibiting signal to DYN+ neurons and work as a disinhibiting function for the itch  
235 signals, also occupy an up-stream position in the spinal level of itch transmission  
236 (Chen and Sun, 2020; Fatima et al., 2019). Therefore, we co-labeled these neurons  
237 together with c-fos. As expected, with HA, C48/80 and CQ treatment, the c-fos  
238 positive cell numbers were significantly increased in the cervical spinal dorsal horn of  
239 all three WT groups ( $p < 0.0001$  for all three groups comparing to naïve) (Fig. 3-5). In  
240 the ROSA<sup>iDTR</sup>;CX3CR1<sup>CreER/+</sup> mice with microglia ablation, HA and C48/80 induced c-  
241 fos up-regulation were significantly inhibited compared with the WT groups,  
242 respectively ( $p < 0.0001$  for both) (Fig. 3B, 4B). However, CQ induced c-fos up-  
243 regulation were not altered by microglia ablation ( $p = 0.073$ ) (Fig. 5B). For the Npr1+  
244 neurons, the percentage of c-fos+ cells were increased from  $8.60 \pm 0.66\%$  to  $23.50 \pm$   
245  $2.05\%$  ( $p < 0.0001$ ) in the HA treated WT mice (Fig. 3C), to  $19.85 \pm 1.97\%$  ( $p <$   
246  $0.0001$ ) in the C48/80 treated WT mice (Fig. 4C), to  $26.7 \pm 4.09\%$  ( $p < 0.0001$ ) in the  
247 CQ treated WT mice (Fig. 5C). Microglia ablation significantly decreased HA ( $p =$   
248  $0.00015$ , Fig. 3C) and C48/80 ( $p = 0.0021$ , Fig. 4C), but not CQ ( $p = 0.7460$ , Fig. 5C)  
249 induced c-fos expression in the Npr1+ neurons. For Sst+ neurons, the percentage of  
250 c-fos+ cells were increased from  $6.36 \pm 0.64\%$  to  $13.10 \pm 1.21\%$  ( $p < 0.0001$ ) in HA  
251 treated WT mice (Fig. 3C), to  $8.56 \pm 0.68\%$  ( $p = 0.0263$ ) in C48/80 treated WT mice  
252 (Fig. 4C), to  $16.91 \pm 2.38$  ( $p < 0.0001$ ) in CQ treated WT mice (Fig. 5C). Microglia

253 ablation significantly decreased HA ( $p = 0.0315$ , Fig. 3C) and C48/80 ( $p = 0.0004$ , Fig.  
254 4C), but not CQ ( $p = 0.2961$ , Fig. 5C) induced c-fos expression in the Sst+ neurons  
255 as well. These results suggested that spinal microglia were involved in the HA  
256 dependent, but not CQ elicited itch signal primary transmission from DRG to the  
257 spinal cord.

### 258 **Spinal CX3CL1-CX3CR1 microglial signal pathway was required for HA** 259 **dependent, but not CQ elicited itch signal transmission**

260 The above results suggested that spinal microglia were stimulated by very up-  
261 stream signals from the HA itch neuronal circuits. Purinergic signal is one of the  
262 major components to activate microglia. The P2Y<sub>12</sub> receptors are highly expressed  
263 in microglia and mediate the microglial process movement towards ATP/ADP  
264 gradient (Haynes et al., 2006). Therefore, we first tested the acute itch responses in  
265 the P2Y<sub>12</sub> KO mice with the HA, C48/80 and CQ models. As shown in Fig. 6, the  
266 scratch responses to HA ( $p = 0.891$ ), C48/80 ( $p = 0.572$  for early and  $p = 0.184$  for  
267 late stages) and CQ ( $p = 0.352$  for early and  $p = 0.865$  for late stages) treatment in  
268 the P2Y<sub>12</sub> KO mice were all similar as that in the WT control mice, respectively. The  
269 results suggested that the P2Y<sub>12</sub> receptors were not required for microglia to  
270 mediate the acute itch transmission.

271 The fractalkine or CX3CL1-CX3CR1 signal pathway is another well-known one  
272 to mediate the microglial-neuronal interaction and is involved in neuropathic pain and  
273 synaptic plasticity (Paolicelli et al., 2011; Zhuang et al., 2007). We then tested the  
274 acute itch responses in the CX3CR1 KO mice with the HA, C48/80 and CQ models.  
275 The results in Fig. 6 showed that the scratch responses to HA ( $p < 0.0001$ ) in the  
276 CX3CR1 KO mice were significantly reduced compared to WT control, the responses  
277 to C48/80 were also significantly reduced in both early ( $p = 0.0206$ ) and late ( $p =$   
278  $0.0012$ ) stages. However, the responses to CQ ( $p = 0.1737$  for the early and  $p =$   
279  $0.8253$  for the late stages) were not altered and were comparable to the WT control  
280 in both stages. These results suggested that the CX3CL1-CX3CR1 signal pathway  
281 was required for microglial activation to mediate the HA dependent itch transmission,

282 but this pathway is not necessary for CQ induced itch responses.

283 To confirm that the spinal level of microglia anticipated in the acute itch  
284 transmission, we examined the effects of intrathecal administration of microglia  
285 inhibitor, minocycline, and CX3CR1 antagonist, JMS-17-2 on acute itch  
286 transmissions. With minocycline (50  $\mu\text{g}$  in 5  $\mu\text{l}$  ACSF, i.t.) treatment at 30 min prior to  
287 the itch agent applications, the scratch responses to both C48/80 and CQ were  
288 significantly reduced in the late stage ( $p = 0.0039$  for C48/80,  $p = 0.0007$  for CQ), but  
289 not in the early stage ( $p = 0.219$  for C48/80,  $p = 0.282$  for CQ) comparing with vehicle  
290 controls. With JMS-17-2 (10  $\mu\text{M}$  in ACSF, 5  $\mu\text{l}$ , i.t.) treatment at 30 min prior to the  
291 itch agent applications, the scratch responses to C48/80 were significantly reduced in  
292 the late stage ( $p = 0.0152$ ), but not early stage ( $p = 0.453$ ); the scratch responses to  
293 CQ were not altered in any stage ( $p = 0.076$  for the early stage,  $p = 0.873$  for the late  
294 stage) comparing with vehicle controls (Fig. 6D-E). The results confirmed that spinal  
295 microglia were involved in the late-stage itch transmission of both the HA dependent  
296 and non-dependent (CQ) types, and spinal microglial CX3CR1 pathway was  
297 recruited to the HA dependent itch transmission, but not CQ induced itch  
298 transmission.

299 To further study how the CX3CL1-CX3CR1 signal pathway affect the HA itch  
300 neuronal circuits. We examined the spinal c-fos activation with RNAscope again in  
301 the CX3CR1 KO mice that treated with HA, C48/80 and CQ, respectively, and co-  
302 labeled the Npr1 and Sst neurons. As shown in Fig. 7A-F and Supplementary Fig. 4,  
303 the total c-fos+ cells in the spinal dorsal horn of HA ( $p < 0.0001$ ) or C48/80 ( $p <$   
304  $0.0001$ ) treated CX3CR1 KO mice were significantly decreased compared with the  
305 WT control mice that received HA and C48/80 treatment, respectively. Consistent  
306 with the behavior data, the CQ ( $p = 0.1367$ ) induced c-fos expression in CX3CR1 KO  
307 mice was comparable to the WT control that received CQ treatment. For the Npr1+  
308 neurons, the percentage of c-fos+ cells in HA ( $p = 0.00014$ ) and C48/80 ( $p = 0.0143$ )  
309 treated CX3CR1 KO mice were both significantly less than that of the WT control  
310 models, respectively; while the percentage of c-fos+ cells in CQ treated CX3CR1 KO  
311 mice were comparable to WT control model. For the Sst+ neurons, the percentage of

312 c-fos+ cells in HA ( $p = 0.0049$ ) treated CX3CR1 KO mice were significantly less than  
313 that of the WT control model, but C48/80 ( $p = 0.4188$ ) induced c-fos+/Sst+ neurons  
314 were not significantly reduced. The CQ ( $p = 0.1552$ ) induced c-fos+/Sst+ neurons  
315 were not affected by CX3CR1 KO. These results suggested that the CX3CL1-  
316 CX3CR1 microglial signal pathway played a critical role to promote the primary  
317 neuronal responses to HA dependent itch signals in the spinal level, particularly for  
318 the Npr1+ neurons.

319 To investigate where did the CX3CL1 signal come from, we examined the  
320 CX3CL1 protein and Cx3cl1 mRNA expression in spinal cord and DRG. Fluorescent  
321 immunostaining study revealed that the CX3CL1 protein was constantly presented in  
322 the DRG (Fig. 7G) and spinal dorsal horn (Fig. S6A) neuronal cell bodies, and was  
323 seen in the spinal nerve fibers in naïve WT mice. the Cx3cl1 mRNA was also  
324 constantly expressed in the spinal dorsal horn in naïve WT mice, but was hard to  
325 detect any change at 90 min after the itch agent applications (Fig. S6B). However,  
326 the Cx3cl1 mRNA was almost non-detectable in naïve DRG. After CQ treatment (90  
327 min), the mRNA signal was still non-detectable in the DRG. After C48/80 treatment  
328 (90 min), the Cx3cl1 mRNA expression was clearly seen in DRG neurons (the  
329 neuronal locations were recognized by the background morphology). The results  
330 suggested that the HA activated DRG sensory neurons could be one of the sources  
331 of CX3CL1, and CX3CL1 could be released at the terminal projecting to spinal dorsal  
332 horn, although the potential release of CX3CL1 from local neurons in the spinal  
333 dorsal horn could not be excluded.

334

## 335 **Discussion**

### 336 **The neuronal circuit differences for HA and CQ elicited itch signal transmission**

337 The HA and CQ triggered itch signal processing pathways share some common  
338 parts in both peripheral DRG and central spinal cord. The CQ receptor, MrgprA3  
339 expressing DRG neurons also express HA receptors and are required for HA itch  
340 transmission (Han et al., 2013); NPRA and SST expressing interneurons in spinal

341 cord are required for both HA and CQ signal processing (Fatima *et al.*, 2019).  
342 However, the pathway differences are critical to define these two types of chemical  
343 itch. HA acts directly on H1 and H4 receptors and requires the activation of trpv1  
344 channels (Imamachi *et al.*, 2009). However, DRG neuronal excitation triggered by CQ  
345 requires TRPA1, instead of TRPV1 (Wilson *et al.*, 2011). The different activation  
346 mechanisms are likely to trigger different neural transmitters release to the spinal  
347 cord. For example, glutamate transmission from MrgprA3+ DRG neurons is required  
348 for both CQ and HA elicited itch, but NMB from MrgprA3+ DRG neurons is only  
349 required for CQ elicited itch (Cui *et al.*, 2022). Therefore, it is possible that there are  
350 some un-discovered neural transmitters responsible for certain kinds of itch signal  
351 transmission. Here we showed that the CX3CL1 signal was required for HA-  
352 dependent itch signal transmission. It is quite possible that CX3CL1 was used as one  
353 of the neural transmitters by the DRG neurons to trigger the HA dependent itch  
354 transmission.

### 355 **The CX3CL1 release mechanism triggered by HA stimulus**

356 The CX3CL1-CX3CR1 pathway was previously reported to be involved in  
357 microglial promotion of neuropathic pain (Zhuang *et al.*, 2007). CX3CL1 is expressed  
358 in both DRG and spinal cord. Peripheral nerve injury was thought to cause the  
359 CX3CL1 cleavage and release from DRG neurons (Verge *et al.*, 2004; Zhuang *et al.*,  
360 2007). Here we observed an obvious upregulation of Cx3cl1 mRNA in the DRGs with  
361 C48/80 stimulus, which triggered endogenous HA release. On the contrary, CQ  
362 stimulus did not change the Cx3cl1 mRNA expression. The difference in DRG Cx3cl1  
363 upregulation was correlated with the involvement of CX3CR1 receptors for the itch  
364 behavioral responses. Taken together, our results suggested that the HA dependent  
365 and non-dependent itch pathways had distinguished downstream responses even at  
366 DRG level.

367 Where was the fractalkine released is still a question remained to be resolved.  
368 Central microglia were most likely the major signal receiver of fractalkine, because  
369 the reduction of c-fos in spinal Npr1 and Sst neurons and the inhibition of itch

370 responses to HA or C48/80 were seen in both the microglia ablation and CX3CR1  
371 KO mice. However, the peripheral macrophages could also contribute to the  
372 enhancement of HA dependent itch signal transmission by responding to fractalkine.  
373 In the CSF1R strategy ablation mice or the CX3CR1 KO mice, we observed the  
374 inhibition of behavioral response to C48/80 in very early stage (0-3 min), but this  
375 phenomenon was not seen in the two kinds of iDTR strategy ablation mice, in which  
376 the peripheral macrophages were partially or fully remained. The DRG macrophages  
377 are surrounding the neuron bodies and could respond quickly to the fractalkine signal  
378 that released from the DRG neuron bodies. The signal added on central microglia  
379 could come from the DRG release diffusing to CSF or directly released from DRG  
380 projecting terminals. On the other hand, since Cx3cl1 was highly expressed in spinal  
381 dorsal horn, the spinal neuronal activities could also trigger fractalkine release.

#### 382 **Microglial pathways for chemical itch other than CX3CL1-CX3CR1**

383 CQ elicited itch response did not require the CX3CL1-CX3CR1 pathway, but  
384 microglia depletion still strongly inhibited the behavioral responses. Although the  
385 percentage of c-fos mRNA upregulated Npr1 and Sst neurons were not decreased in  
386 the CQ treated microglia depletion mice, we did see an overall c-Fos protein level  
387 decrease in spinal dorsal horn with immunostaining (supplementary Fig. 5). The  
388 different results between mRNA and protein assays could be due to the different  
389 technique sensitivities of RNAscope and immunostaining that RNAscope was more  
390 sensitive and would detect and amplify weak c-fos signals. These results suggested  
391 that microglia also contributed to the CQ elicited itch signal transmission at spinal  
392 level and there were some other signals that triggered microglial responses. For  
393 neuropathic pain, the purinergic signal was thought to be important to activate  
394 microglia and promote the development of chronic pain. Depletion the purinergic  
395 receptors, such as P2X4 (Tsuda et al., 2009), P2X7 (Chessell et al., 2005) or P2Y12  
396 (Tozaki-Saitoh et al., 2008), all dramatically alleviated or totally blocked neuropathic  
397 pain. P2X4 can respond to ATP at nanomolar level, which is about one thousand  
398 times lower than that for P2X7. Therefore, P2X4 could be a good candidate to

399 mediate the quick microglial responses for itch transmission. P2Y<sub>12</sub> receptors are  
400 highly expressed in central microglia and mediate the microglial process movement  
401 toward ATP gradient (Haynes *et al.*, 2006). Unexpectedly, our results showed that the  
402 P2Y<sub>12</sub> KO mice did not show any deficits in chemical itch response, suggesting that  
403 this directional process movement was not necessary for microglia to enhance  
404 neuronal excitability quickly. Further studies are required to examine other signal  
405 pathways for microglia to promote chemical itch transmission.

406 The down-stream of microglial responses to itch signals is another question  
407 remained to be resolved in the future. Cytokines such as IL-31 and TNF- $\alpha$  have been  
408 found to contribute to acute and chronic itch (Cevikbas *et al.*, 2014; Miao *et al.*, 2018).  
409 Microglia was one of the major sources of TNF- $\alpha$  and are involved in acute  
410 inflammatory pain by enhancing neuronal excitability (Berta *et al.*, 2014). Thus,  
411 microglia released TNF- $\alpha$  is a potential mediator for acute chemical itch as well.  
412 BDNF is known to be the down-stream of P2X<sub>4</sub> that released by microglia to mediate  
413 neuropathic pain through disinhibiting mechanism (Beggs *et al.*, 2012). Whether this  
414 pathway also contribute to itch signal transmission is worthy to test as well.

415 In conclusion, our present study revealed that central microglia played a critical  
416 role in promoting acute chemical itch signal transmission that induced by HA  
417 dependent or non-dependent (CQ) agents. However, microglia participated in the HA  
418 dependent and non-dependent itch signal transmission in different ways. For the HA  
419 dependent signals, the CX<sub>3</sub>CL<sub>1</sub>-CX<sub>3</sub>CR<sub>1</sub> signal pathway could be the major  
420 component to trigger microglial responses and then promote the neuronal activities of  
421 the spinal Npr<sub>1</sub><sup>+</sup> and Sst<sup>+</sup> neurons. The CX<sub>3</sub>CL<sub>1</sub> signal was most likely to be  
422 released by the HA activated DRG sensory neurons that projected to spinal dorsal  
423 horn. However, how the CQ signal activate microglia and the down-stream microglial  
424 response mechanisms remained unclear.

## 425 **Acknowledgements**

426 This work was supported by the Jiangxi Province “2000 talent plan” to JP  
427 (jxsq2018106039), the National Natural Science Foundation of China (32060199 to

428 J.P., 82071245 to H.P., and 31971035, 31771182 to B.M.L.) and Jiangxi Province  
429 Natural Science Foundation (20171ACB20002 to B.M.L.).

### 430 **Author contributions**

431 J.P., H.P. and Y.Y. conceived of the study. Y.Y., B.M., H.X.Z., X.Y., M.T.X. and Y.L.  
432 performed experiments and analyzed data. J.P., Y.Y, Y. U. L, H.P., C.L.M. and B.M.L.  
433 wrote the manuscript.

434 **Competing interests:** The authors declare no competing interests.

435

### 436 **Materials and methods**

#### 437 **Animals**

438 All experimental procedures were approved by the Institutional Animal Care and  
439 Use Committee of Nanchang University. We followed the guidelines set forth by the  
440 Guide of the Care and Use of Laboratory Animals 8th Edition. The P2Y12 KO mice  
441 were originally obtained from Dr. Long-Jun Wu lab at Mayo Clinic, which was  
442 originally generated by Dr. Pamela B. Conley(Andre et al., 2003). CX3CR1-CreER  
443 (#021160), TMEM119-CreER (#031820), TMEM119-EGFP (#031823), CSF1R-flox  
444 (#021212), and ROS26-iDTR (007900) mice were originally purchased from Jackson  
445 Laboratory. CX3CR1-CreER mice were crossed with CSF1R-flox mice to get the  
446 CSF1R<sup>flox/flox</sup>;CX3CR1<sup>CreER/+</sup> mice, and crossed with the ROSA-iDTR mice to get the  
447 ROSA<sup>iDTR/+</sup>;CX3CR1<sup>CreER/+</sup> mice. TMEM119-CreER mice were crossed with the  
448 ROSA-iDTR mice to get the ROSA<sup>iDTR/+</sup>;TMEM119<sup>CreER/+</sup> mice. Wild type (WT)  
449 C57BL6/J mice were obtained from SLAC laboratory animal CO. LTD (Changsha,  
450 China). Mice were group (4-5 per cage) housed in 12/12 light/dark cycle, 23 ± 1 °C  
451 vivarium environment. Food and water were available ad libitum. Mice (8-14 weeks  
452 old) were assigned to experimental groups randomly within a litter. Experimenters  
453 were blind to drug treatments and mouse genotypes until all data collection was done.  
454 Both male and female mice were used.

#### 455 **Microglia ablation**



456 **CSF1R strategy**

457 CSF1R<sup>flox/flox</sup>;CX3CR1<sup>CreER/+</sup> transgenic mice were used for this purpose.  
458 Intraperitoneally (i.p.) injection of tamoxifen (TM, 150 mg kg<sup>-1</sup> in corn oil, 3 doses with  
459 48-hr intervals) were used to trigger the csf1r gene knockout in CX3CR1+ cells.  
460 CSF1R<sup>flox/flox</sup> mice were used as control and received the same doses of TM. Acute  
461 itch models were tested at 24 hr after the last TM treatment.

462 **iDTR strategies**

463 ROSA<sup>iDTR/+</sup>;CX3CR1<sup>CreER/+</sup> and ROSA<sup>iDTR/+</sup>;P2Y12<sup>CreER/CreER</sup> transgenic mice were  
464 used. For the ROSA<sup>iDTR/+</sup>;CX3CR1<sup>CreER/+</sup> mice, 4 doses of TM (150 mg kg<sup>-1</sup> in corn oil)  
465 were i.p. injected with 48-hr intervals to trigger the DTR expression in CX3CR1+ cells.  
466 3 weeks after the last TM injection, two doses of Diphtheria Toxin (DT) were i.p.  
467 injected (0.75 µg per mice) with a 48-hr interval to ablate central microglia, but  
468 avoided to ablate most of the circulating monocytes and peripheral macrophages.  
469 For the ROSA<sup>iDTR/+</sup>;TMEM119<sup>CreER/+</sup> mice, 10 doses of TM (150 mg kg<sup>-1</sup> in corn oil)  
470 were i.p. injected with 48-hr intervals to trigger the DTR expression in central  
471 microglia. 5 days after the last TM injection, two doses of Diphtheria Toxin (DT) were  
472 i.p. injected (0.75 µg per mice) with a 48-hr interval to ablate central microglia.

473 **Intrathecal injections**

474 The microglia activation inhibitor, minocycline (10 µg/µl in ACSF that contained  
475 0.1% DMSO and 0.4% PEG300) and the CX3CR1 antagonist, JMS-17-2 (10 µM in  
476 ACSF that contained 0.1% DMSO and 0.4% PEG300) were intrathecal (i.t.) injected  
477 as previous described. In brief, mice were hand restricted, a 31G needle that  
478 attached with 10-µL Hamilton syringe (Hamilton Bonaduz AG) were direct lumbar  
479 punched between L5 and L6 vertebrae of the spine with around 15° angle,  
480 successful insertion was indicated by tail flick. 5 µl of the drug solution or control  
481 vehicle was injected into the spinal fluid space in 2 min, and the needle was hold in  
482 place for one more minute. The i.t. injections were done 30 min prior to the itch agent  
483 application.

484 **Behavioral Testing**

485 ***Acute mechanical itch***

486 To test the acute mechanical itch, the fur behind the ears was shaved 5 days  
487 before testing. Mice were habituated for 30 min in behavioral testing apparatus (IITC,  
488 Life Science) for 2 consecutive days. On the testing day, mice were placed in the  
489 plastic chambers and allowed at least 30 min for habituation. Mice then received five  
490 separate mechanical stimuli for 1 s with 3-5 s intervals at randomly selected sites on  
491 the skin behind the ears. Mechanical stimuli were delivered with von Frey filaments  
492 (0.02-0.16g, North Coast medical). The scratching response of hind paw toward the  
493 poking site was considered as a positive response (Pan *et al.*, 2019).

494 ***Acute chemical itch***

495 To test the acute chemical itch, the fur on the neck was shaved 5 days before  
496 testing. Mice were habituated same as for the acute mechanical itch test. On the  
497 testing day, mice were placed in the plastic chambers and allowed at least 30 min for  
498 habituation. Then the behavior of mice was video recorded for at least 30 min after  
499 chemical injection. Compound histamine (50 µg, Sigma #H7250) in 10 µl of sterile  
500 saline was injected intradermally into the nape. Compound chloroquine (200 µg,  
501 Sigma #C6628), β-alanine (50 mM Sigma #146064), C48/80 (100 µg, Sigma #C2313)  
502 in 50 µl of sterile saline was injected intradermally into the nape. Scratching bouts  
503 were counted for 30 min after injection.

504 ***Immunofluorescence***

505 Experimental mice were deeply anesthetized by 1% pentobarbital sodium (50  
506 mg/kg, i.p.) and transcardially perfused with 0.9% saline followed by 4%  
507 paraformaldehyde solution. The cervical segment of spinal cord (C3-C5) and their  
508 connected DRGs were collected and post-fixed with the same 4% PFA for 4–6h at  
509 4 °C , and then gradient dehydrated in 20% and 30% (w/v) sucrose solution  
510 sequentially. Sample sections (14 µm in thickness) were prepared on gelatin-coated  
511 glass slide with a freezing microtome (Leica CM900, Germany). The sections were  
512 blocked with 5% goat serum and 0.3% Triton X-100 (Sigma) in TBS buffer for 45 min,  
513 and then incubated overnight at 4 °C with primary antibody for rabbit-anti-Iba1

514 (1:1000, Abcam, Catalogue ab178846), rat-anti-F4/80 (1:500, Biolegend, Catalogue  
515 #123102) and rabbit-anti-c-Fos (1:500, Cell Signaling, Catalogue #2250). After rinse  
516 for three times for at least 30 minutes with TBS buffer, the sections were then  
517 incubated for 90 min at room temperature with secondary antibodies (1:500, Alexa  
518 Fluor 568, Alexa Fluor 488, Life Technologies). After three rinses, slices were  
519 incubated with DAPI solution for 5 minutes and followed by washout. Fluorescent  
520 images were obtained with a fluorescence microscope (EVOS FL Color, life  
521 technologies). Cell counting and fluorescent signal intensity was quantified using  
522 Image J software (1.52a, National Institutes of Health, Bethesda, MD).

### 523 **RNAscope**

524 The frozen section samples of the same sets for the above immunofluorescence  
525 were taken. Samples were washed in PBS for 5 min and air dried. Next about 5-8  
526 drops of RNAscope® hydrogen peroxide were added to coat the samples and  
527 incubated at room temperature for 10 min and then washed with distilled water. Then  
528 immerse the samples into the RNAscope target repair reagent at 98-100 °C for 5 min,  
529 then transferred to distilled water for cooling. The samples were then incubated with  
530 100% ethanol for 3 minutes and drawn a hydrophobic ring around it. Appropriate  
531 amount of RNAscope® protease III reagent was dropped to completely cover the  
532 sections, and incubation was conducted at 40°C for 30 min. The samples were then  
533 process immediately with the provided standard RNAscope assay (Advanced Cell  
534 Diagnostics, Inc.). mm-fos, mm-npr1 and mm-sst probes were used for triple labeling at  
535 opal 690, 520 and 570 channels. mm-cx3cl1 probe was used for single labeling at opal  
536 690 channel. The samples were finally stained with DAPI. The fluorescent images were  
537 obtained with the EVOS microscope and analyzed with ImageJ as well.

### 538 **Statistical Analysis**

539 Statistical analysis was performed using GraphPad Prism 7.00 (GraphPad  
540 software, Inc). Unpaired Student's test (t-test) and two-way ANOVA with repeated  
541 measurement were applied for group-group comparison.  $p < 0.05$  was considered  
542 statistically significant.

543

544 **References:**

- 545 Akiyama, T., Tominaga, M., Takamori, K., Carstens, M.I., and Carstens, E. (2014). Roles of glutamate,  
546 substance P, and gastrin-releasing peptide as spinal neurotransmitters of histaminergic and  
547 nonhistaminergic itch. *Pain* *155*, 80-92. 10.1016/j.pain.2013.09.011.
- 548 Andre, P., Delaney, S.M., LaRocca, T., Vincent, D., DeGuzman, F., Jurek, M., Koller, B., Phillips, D.R., and  
549 Conley, P.B. (2003). P2Y12 regulates platelet adhesion/activation, thrombus growth, and thrombus  
550 stability in injured arteries. *J Clin Invest* *112*, 398-406. 10.1172/JCI17864.
- 551 Beggs, S., Trang, T., and Salter, M.W. (2012). P2X4R+ microglia drive neuropathic pain. *Nat Neurosci* *15*,  
552 1068-1073. 10.1038/nn.3155.
- 553 Berta, T., Park, C.K., Xu, Z.Z., Xie, R.G., Liu, T., Lu, N., Liu, Y.C., and Ji, R.R. (2014). Extracellular caspase-6  
554 drives murine inflammatory pain via microglial TNF-alpha secretion. *J Clin Invest* *124*, 1173-1186.  
555 10.1172/JCI72230.
- 556 Brandt, E.B., and Sivaprasad, U. (2011). Th2 Cytokines and Atopic Dermatitis. *J Clin Cell Immunol* *2*,  
557 10.4172/2155-9899.1000110.
- 558 Cevikbas, F., Wang, X., Akiyama, T., Kempkes, C., Savinko, T., Antal, A., Kukova, G., Buhl, T., Ikoma, A.,  
559 Buddenkotte, J., et al. (2014). A sensory neuron-expressed IL-31 receptor mediates T helper cell-  
560 dependent itch: Involvement of TRPV1 and TRPA1. *J Allergy Clin Immunol* *133*, 448-460.  
561 10.1016/j.jaci.2013.10.048.
- 562 Chen, X.J., and Sun, Y.G. (2020). Central circuit mechanisms of itch. *Nat Commun* *11*, 3052.  
563 10.1038/s41467-020-16859-5.
- 564 Chessell, I.P., Hatcher, J.P., Bountra, C., Michel, A.D., Hughes, J.P., Green, P., Egerton, J., Murfin, M.,  
565 Richardson, J., Peck, W.L., et al. (2005). Disruption of the P2X7 purinoceptor gene abolishes chronic  
566 inflammatory and neuropathic pain. *Pain* *114*, 386-396. 10.1016/j.pain.2005.01.002.
- 567 Cui, L., Guo, J., Cranfill, S.L., Gautam, M., Bhattarai, J., Olson, W., Beattie, K., Challis, R.C., Wu, Q., Song,  
568 X., et al. (2022). Glutamate in primary afferents is required for itch transmission. *Neuron* *110*, 809-823  
569 e805. 10.1016/j.neuron.2021.12.007.
- 570 Davidson, S., and Giesler, G.J. (2010). The multiple pathways for itch and their interactions with pain.  
571 *Trends Neurosci* *33*, 550-558. 10.1016/j.tins.2010.09.002.
- 572 Dong, X., and Dong, X. (2018). Peripheral and Central Mechanisms of Itch. *Neuron* *98*, 482-494.  
573 10.1016/j.neuron.2018.03.023.
- 574 Elmore, M.R., Najafi, A.R., Koike, M.A., Dagher, N.N., Spangenberg, E.E., Rice, R.A., Kitazawa, M.,  
575 Matusow, B., Nguyen, H., West, B.L., and Green, K.N. (2014). Colony-stimulating factor 1 receptor  
576 signaling is necessary for microglia viability, unmasking a microglia progenitor cell in the adult brain.  
577 *Neuron* *82*, 380-397. 10.1016/j.neuron.2014.02.040.
- 578 Fatima, M., Ren, X., Pan, H., Slade, H.F.E., Asmar, A.J., Xiong, C.M., Shi, A., Xiong, A.E., Wang, L., and  
579 Duan, B. (2019). Spinal somatostatin-positive interneurons transmit chemical itch. *Pain* *160*, 1166-  
580 1174. 10.1097/j.pain.0000000000001499.
- 581 Gomez Perdiguero, E., Klapproth, K., Schulz, C., Busch, K., Azzoni, E., Crozet, L., Garner, H., Trouillet, C.,  
582 de Bruijn, M.F., Geissmann, F., and Rodewald, H.R. (2015). Tissue-resident macrophages originate from  
583 yolk-sac-derived erythro-myeloid progenitors. *Nature* *518*, 547-551. 10.1038/nature13989.
- 584 Han, L., Ma, C., Liu, Q., Weng, H.J., Cui, Y., Tang, Z., Kim, Y., Nie, H., Qu, L., Patel, K.N., et al. (2013). A  
585 subpopulation of nociceptors specifically linked to itch. *Nat Neurosci* *16*, 174-182. 10.1038/nn.3289.
- 586 Haynes, S.E., Hollopeter, G., Yang, G., Kurpius, D., Dailey, M.E., Gan, W.B., and Julius, D. (2006). The

587 P2Y12 receptor regulates microglial activation by extracellular nucleotides. *Nat Neurosci* 9, 1512-1519.  
588 10.1038/nn1805.

589 Huang, J., Polgar, E., Solinski, H.J., Mishra, S.K., Tseng, P.Y., Iwagaki, N., Boyle, K.A., Dickie, A.C.,  
590 Kriegbaum, M.C., Wildner, H., et al. (2018). Circuit dissection of the role of somatostatin in itch and  
591 pain. *Nat Neurosci* 21, 707-716. 10.1038/s41593-018-0119-z.

592 Imamachi, N., Park, G.H., Lee, H., Anderson, D.J., Simon, M.I., Basbaum, A.I., and Han, S.K. (2009).  
593 TRPV1-expressing primary afferents generate behavioral responses to pruritogens via multiple  
594 mechanisms. *Proc Natl Acad Sci U S A* 106, 11330-11335. 10.1073/pnas.0905605106.

595 Inoue, K., and Tsuda, M. (2018). Microglia in neuropathic pain: cellular and molecular mechanisms and  
596 therapeutic potential. *Nat Rev Neurosci* 19, 138-152. 10.1038/nrn.2018.2.

597 Kashiba, H., Fukui, H., Morikawa, Y., and Senba, E. (1999). Gene expression of histamine H1 receptor in  
598 guinea pig primary sensory neurons: a relationship between H1 receptor mRNA-expressing neurons  
599 and peptidergic neurons. *Brain Res Mol Brain Res* 66, 24-34. 10.1016/s0169-328x(98)00346-5.

600 Liu, Y., Abdel Samad, O., Zhang, L., Duan, B., Tong, Q., Lopes, C., Ji, R.R., Lowell, B.B., and Ma, Q. (2010).  
601 VGLUT2-dependent glutamate release from nociceptors is required to sense pain and suppress itch.  
602 *Neuron* 68, 543-556. 10.1016/j.neuron.2010.09.008.

603 MacDonald, K.P., Palmer, J.S., Cronau, S., Seppanen, E., Olver, S., Raffelt, N.C., Kuns, R., Pettit, A.R.,  
604 Clouston, A., Wainwright, B., et al. (2010). An antibody against the colony-stimulating factor 1 receptor  
605 depletes the resident subset of monocytes and tissue- and tumor-associated macrophages but does  
606 not inhibit inflammation. *Blood* 116, 3955-3963. 10.1182/blood-2010-02-266296.

607 McNeil, B.D., Pundir, P., Meeker, S., Han, L., Udem, B.J., Kulka, M., and Dong, X. (2015). Identification  
608 of a mast-cell-specific receptor crucial for pseudo-allergic drug reactions. *Nature* 519, 237-241.  
609 10.1038/nature14022.

610 Miao, X., Huang, Y., Liu, T.T., Guo, R., Wang, B., Wang, X.L., Chen, L.H., Zhou, Y., Ji, R.R., and Liu, T.  
611 (2018). TNF-alpha/TNFR1 Signaling is Required for the Full Expression of Acute and Chronic Itch in  
612 Mice via Peripheral and Central Mechanisms. *Neurosci Bull* 34, 42-53. 10.1007/s12264-017-0124-3.

613 Mishra, S.K., and Hoon, M.A. (2013). The cells and circuitry for itch responses in mice. *Science* 340,  
614 968-971. 10.1126/science.1233765.

615 Nattkemper, L.A., Tey, H.L., Valdes-Rodriguez, R., Lee, H., Mollanazar, N.K., Albornoz, C., Sanders, K.M.,  
616 and Yosipovitch, G. (2018). The Genetics of Chronic Itch: Gene Expression in the Skin of Patients with  
617 Atopic Dermatitis and Psoriasis with Severe Itch. *J Invest Dermatol* 138, 1311-1317.  
618 10.1016/j.jid.2017.12.029.

619 Oetjen, L.K., Mack, M.R., Feng, J., Whelan, T.M., Niu, H., Guo, C.J., Chen, S., Trier, A.M., Xu, A.Z.,  
620 Tripathi, S.V., et al. (2017). Sensory Neurons Co-opt Classical Immune Signaling Pathways to Mediate  
621 Chronic Itch. *Cell* 171, 217-228 e213. 10.1016/j.cell.2017.08.006.

622 Pan, H., Fatima, M., Li, A., Lee, H., Cai, W., Horwitz, L., Hor, C.C., Zaher, N., Cin, M., Slade, H., et al.  
623 (2019). Identification of a Spinal Circuit for Mechanical and Persistent Spontaneous Itch. *Neuron* 103,  
624 1135-1149 e1136. 10.1016/j.neuron.2019.06.016.

625 Paolicelli, R.C., Bolasco, G., Pagani, F., Maggi, L., Scianni, M., Panzanelli, P., Giustetto, M., Ferreira, T.A.,  
626 Guiducci, E., Dumas, L., et al. (2011). Synaptic pruning by microglia is necessary for normal brain  
627 development. *Science* 333, 1456-1458. 10.1126/science.1202529.

628 Parkhurst, C.N., Yang, G., Ninan, I., Savas, J.N., Yates, J.R., 3rd, Lafaille, J.J., Hempstead, B.L., Littman,  
629 D.R., and Gan, W.B. (2013). Microglia promote learning-dependent synapse formation through brain-  
630 derived neurotrophic factor. *Cell* 155, 1596-1609. 10.1016/j.cell.2013.11.030.

- 631 Pasparakis, M., Haase, I., and Nestle, F.O. (2014). Mechanisms regulating skin immunity and  
632 inflammation. *Nat Rev Immunol* 14, 289-301. 10.1038/nri3646.
- 633 Peng, J., Gu, N., Zhou, L., U, B.E., Murugan, M., Gan, W.B., and Wu, L.J. (2016). Microglia and  
634 monocytes synergistically promote the transition from acute to chronic pain after nerve injury. *Nat*  
635 *Commun* 7, 12029. 10.1038/ncomms12029.
- 636 Rao, K.N., and Brown, M.A. (2008). Mast cells: multifaceted immune cells with diverse roles in health  
637 and disease. *Ann N Y Acad Sci* 1143, 83-104. 10.1196/annals.1443.023.
- 638 Ringkamp, M., Schepers, R.J., Shimada, S.G., Johaneck, L.M., Hartke, T.V., Borzan, J., Shim, B., LaMotte,  
639 R.H., and Meyer, R.A. (2011). A role for nociceptive, myelinated nerve fibers in itch sensation. *J*  
640 *Neurosci* 31, 14841-14849. 10.1523/JNEUROSCI.3005-11.2011.
- 641 Satoh, J., Kino, Y., Asahina, N., Takitani, M., Miyoshi, J., Ishida, T., and Saito, Y. (2016). TMEM119 marks  
642 a subset of microglia in the human brain. *Neuropathology* 36, 39-49. 10.1111/neup.12235.
- 643 Schmelz, M., Schmidt, R., Bickel, A., Handwerker, H.O., and Torebjork, H.E. (1997). Specific C-receptors  
644 for itch in human skin. *J Neurosci* 17, 8003-8008.
- 645 Shim, W.S., and Oh, U. (2008). Histamine-induced itch and its relationship with pain. *Mol Pain* 4, 29.  
646 10.1186/1744-8069-4-29.
- 647 Simone, D.A., Zhang, X., Li, J., Zhang, J.M., Honda, C.N., LaMotte, R.H., and Giesler, G.J., Jr. (2004).  
648 Comparison of responses of primate spinothalamic tract neurons to pruritic and algogenic stimuli. *J*  
649 *Neurophysiol* 91, 213-222. 10.1152/jn.00527.2003.
- 650 Strakhova, M.I., Nikkel, A.L., Manelli, A.M., Hsieh, G.C., Esbenshade, T.A., Brioni, J.D., and Bitner, R.S.  
651 (2009). Localization of histamine H4 receptors in the central nervous system of human and rat. *Brain*  
652 *Res* 1250, 41-48. 10.1016/j.brainres.2008.11.018.
- 653 Tozaki-Saitoh, H., Tsuda, M., Miyata, H., Ueda, K., Kohsaka, S., and Inoue, K. (2008). P2Y12 receptors in  
654 spinal microglia are required for neuropathic pain after peripheral nerve injury. *J Neurosci* 28, 4949-  
655 4956. 10.1523/JNEUROSCI.0323-08.2008.
- 656 Tsuda, M., Kuboyama, K., Inoue, T., Nagata, K., Tozaki-Saitoh, H., and Inoue, K. (2009). Behavioral  
657 phenotypes of mice lacking purinergic P2X4 receptors in acute and chronic pain assays. *Mol Pain* 5, 28.  
658 10.1186/1744-8069-5-28.
- 659 Usoskin, D., Furlan, A., Islam, S., Abdo, H., Lonnerberg, P., Lou, D., Hjerling-Leffler, J., Haeggstrom, J.,  
660 Kharchenko, O., Kharchenko, P.V., et al. (2015). Unbiased classification of sensory neuron types by  
661 large-scale single-cell RNA sequencing. *Nat Neurosci* 18, 145-153. 10.1038/nn.3881.
- 662 Verge, G.M., Milligan, E.D., Maier, S.F., Watkins, L.R., Naeve, G.S., and Foster, A.C. (2004). Fractalkine  
663 (CX3CL1) and fractalkine receptor (CX3CR1) distribution in spinal cord and dorsal root ganglia under  
664 basal and neuropathic pain conditions. *Eur J Neurosci* 20, 1150-1160. 10.1111/j.1460-  
665 9568.2004.03593.x.
- 666 Wan, L., Jin, H., Liu, X.Y., Jeffry, J., Barry, D.M., Shen, K.F., Peng, J.H., Liu, X.T., Jin, J.H., Sun, Y., et al.  
667 (2017). Distinct roles of NMB and GRP in itch transmission. *Sci Rep* 7, 15466. 10.1038/s41598-017-  
668 15756-0.
- 669 Wilson, S.R., Gerhold, K.A., Bifolck-Fisher, A., Liu, Q., Patel, K.N., Dong, X., and Bautista, D.M. (2011).  
670 TRPA1 is required for histamine-independent, Mas-related G protein-coupled receptor-mediated itch.  
671 *Nat Neurosci* 14, 595-602. 10.1038/nn.2789.
- 672 Yosipovitch, G., Greaves, M.W., and Schmelz, M. (2003). Itch. *Lancet* 361, 690-694. 10.1016/S0140-  
673 6736(03)12570-6.
- 674 Zhuang, Z.Y., Kawasaki, Y., Tan, P.H., Wen, Y.R., Huang, J., and Ji, R.R. (2007). Role of the CX3CR1/p38

675 MAPK pathway in spinal microglia for the development of neuropathic pain following nerve injury-  
676 induced cleavage of fractalkine. *Brain Behav Immun* 21, 642-651. 10.1016/j.bbi.2006.11.003.

677

## 678 **Figure legends**

679

680 **Figure 1.** CSF1R depletion inhibited acute itch responses to HA, C48/80 and CQ. **(A-**  
681 **B)** With Tamoxifen (TM) treatment, the iba1+ microglia cells in spinal cord (SC) and  
682 macrophage cells in dorsal root ganglion (DRG) of the CSF1R<sup>fl/fl</sup>;CX3CR1<sup>CreER/+</sup> mice  
683 were reduced to 1.6±1.1% and 19.4±2.9% of basal levels, respectively. While the  
684 F4/80+ dendritic cells in the skin were not altered. The recovery samples were  
685 obtained at 15 days after the last TM injection. Iba1+ cells in both SC ( $p = 0.938$ , un-  
686 paired t-test) and DRG ( $p = 0.721$ ) were returned to control levels ( $n = 3$  mice for  
687 each group, CSF1R<sup>fl/fl</sup> mice were used as control and received the same doses of TM).  
688 The arrow indicated cells were enlarged at the bottom-left to show the morphology.  
689 **(C)** Scratch responses over 30 min with HA (50 µg in 10 µl saline), C48/80 (100 µg in  
690 50 µl saline) and CQ (200 µg in 50 µl saline) injected into nape, respectively. CSF1R  
691 depletion significantly decreased the scratch responses to HA ( $n = 10$  for control,  $n =$   
692  $11$  for CSF1R depletion,  $p < 0.0001$ ) during the 30 min observation; decreased the  
693 responses to C48/80 at both the early (0-3 min,  $p = 0.040$ ) and late (3-30 min,  $p =$   
694  $0.00011$ ) stages ( $n = 7$  for control,  $n = 8$  for CSF1R depletion); decreased the  
695 responses to CQ at both the early ( $p = 0.0049$ ) and late ( $p < 0.0001$ ) stages ( $n = 10$   
696 for control,  $n = 12$  for CSF1R depletion). The secondary test after microglia recovery  
697 were done at 14 days after the first one with the same agents. The responses to HA  
698 ( $n = 8$ ,  $p = 0.055$ ), C48/80 ( $n = 7$ ,  $p = 0.390$  for 0-3 min,  $p = 0.125$  for 3-30 min) and  
699 CQ ( $n = 11$ ,  $p = 0.938$  for 0-3 min,  $p = 0.941$  for 3-30 min) were all back to control  
700 levels, respectively. \* $p < 0.05$ , \*\* $p < 0.01$ , \*\*\* $p < 0.001$ , \*\*\*\* $p < 0.0001$ , un-paired t-  
701 test. Data were presented as mean ± SEM.

702

703 **Figure 2.** Central microglia ablation inhibited acute itch responses to HA, C48/80 and  
704 CQ. **(A-B)** With two doses of Diphtheria Toxin (DT, i.p., 0.75 µg in 200 µl PBS per  
705 injection, 48 hr interval) treated to the TM pre-treated ROSA<sup>IDTR/+</sup>;CX3CR1<sup>CreER/+</sup> and  
706 ROSA<sup>IDTR/+</sup>;TMEM119<sup>CreER/+</sup> mice, microglia cell densities in the SC were reduced to  
707  $23.7 \pm 5.3\%$  ( $p < 0.0001$ ) and  $56.8 \pm 1.8\%$  ( $p < 0.0001$ ) of control level, respectively;  
708 in the DRG, the Iba1+ macrophages were reduced to  $62.1 \pm 7.5\%$  in the CX3CR1-  
709 CreER mice ( $p = 0.00031$ ), and were not affected in the TMEM119-CreER mice ( $p =$   
710  $0.709$ ). ( $n = 3$  mice for each group, ROSA<sup>IDTR/+</sup> mice were used as control and  
711 received the same doses of TM and DT, respectively). Arrow indicated cells were  
712 enlarged in the bottom right corners. **(C)** Microglia ablation in the  
713 ROSA<sup>IDTR/+</sup>;CX3CR1<sup>CreER/+</sup> mice significantly reduced the scratch responses to HA ( $n$   
714  $= 9$  for control,  $n = 7$  for ablation,  $p = 0.017$ ) during the 30 min observation; reduced  
715 the responses to C48/80 at the late ( $p = 0.00073$ ), but not early ( $p = 0.775$ ) stage ( $n$   
716  $= 8$  for control,  $n = 8$  for ablation); reduced the responses to CQ at both the early ( $p =$   
717  $0.0217$ ) and late ( $p = 0.0026$ ) stages ( $n = 8$  for control,  $n = 8$  for ablation). **(D)**

718 Microglia ablation in the ROSA<sup>iDTR/+</sup>;TMEM119<sup>CreER/+</sup> mice significantly reduced the  
719 scratch responses to C48/80 at the late ( $p = 0.0091$ ), but not early ( $p = 0.085$ ) stage  
720 ( $n = 8$  for control,  $n = 8$  for ablation); reduced the responses to CQ at the late ( $p =$   
721  $0.00038$ ), but not early ( $p = 0.092$ ) stage ( $n = 9$  for control,  $n = 10$  for ablation).  $*p <$   
722  $0.05$ ,  $**p < 0.01$ ,  $***p < 0.001$ , un-paired t-test. Data were presented as mean  $\pm$   
723 SEM.

724

725 **Figure 3.** HA induced spinal c-fos mRNA expression was reduced in microglia  
726 ablation mice. (A) representative RNAscope images showed triple labeling of c-fos,  
727 npr-1 and Sst mRNA in the spinal dorsal horn of WT naïve, HA treated WT and  
728 microglia ablation (ROSA<sup>iDTR</sup>;CX3CR1<sup>CreER/+</sup>) mice. White and orange arrows  
729 indicated c-fos+ cells were enlarged at the bottom-left of the middle and right panels  
730 to show the co-labeling with npr-1 and Sst, respectively. (B-C) Statistic data showed  
731 that HA induced increase of overall c-fos+ cell number in WT mice were greatly  
732 reduced in the microglia ablation mice (B,  $p < 0.0001$  for both naïve vs. WT + HA and  
733 WT + HA vs. ablation + HA), and the increase of c-fos+ percentage of Npr1+ and  
734 Sst+ cells were also significantly reduced (C,  $p < 0.0001$  for naïve vs. WT + HA in  
735 both Npr1+ and Sst+ cells,  $p = 0.00015$  for WT + HA vs. ablation + HA in Npr1+ cells,  
736  $p = 0.0315$  for WT + HA vs. ablation + HA in Sst+ cells).  $n = 15, 16$  and  $13$  images for  
737 naïve, WT + HA, and ablation + HA group, respectively. Samples were obtained from  
738 3 mice for each group.  $*p < 0.05$ ,  $***p < 0.001$ ,  $****p < 0.0001$ , un-paired t-test. Data  
739 were presented as mean  $\pm$  SEM.

740

741 **Figure 4.** C48/80 induced spinal c-fos mRNA expression was reduced in microglia  
742 ablation mice. (A) representative RNAscope images showed triple labeling of c-fos,  
743 npr-1 and Sst mRNA in the spinal dorsal horn of C48/80 treated WT and microglia  
744 ablation (ROSA<sup>iDTR</sup>;CX3CR1<sup>CreER/+</sup>) mice. White and orange arrows indicated c-fos+  
745 cells were enlarged at the bottom-left of the middle and right panels to show the co-  
746 labeling with Npr1 and Sst, respectively. (B-C) Statistic data showed that C48/80  
747 induced increase of overall c-fos+ cell number in WT mice were greatly reduced in  
748 the microglia ablation mice (B,  $p < 0.0001$  for both naïve vs. WT + C48/80 and WT +  
749 C48/80 vs. ablation + C48/80), and increase of c-fos+ percentage of Npr1+ and Sst+  
750 neurons were also significantly reduced (C,  $p < 0.0001$  for naïve vs. WT + C48/80 in  
751 Npr1+ and  $p = 0.0263$  in Sst+ cells,  $p = 0.00213$  for WT + C48/80 vs. ablation +  
752 C48/80 in Npr1+ cells,  $p = 0.00040$  for WT + C48/80 vs. ablation + C48/80 in Sst+  
753 cells).  $n = 13$  and  $15$  images for WT + C48/80, and ablation + C48/80 group,  
754 respectively. Naïve data were equal to Fig. 3. Samples were obtained from 3 mice for  
755 each group.  $*p < 0.05$ ,  $**p < 0.01$ ,  $***p < 0.001$ ,  $****p < 0.0001$ , un-paired t-test. Data  
756 were presented as mean  $\pm$  SEM.

757

758 **Figure 5.** CQ induced spinal c-fos mRNA expression was not affected by microglia  
759 ablation. (A) representative RNAscope images showed triple labeling of c-fos, npr-1  
760 and Sst mRNA in the spinal dorsal horn of CQ treated WT and microglia ablation  
761 (ROSA<sup>iDTR</sup>;CX3CR1<sup>CreER/+</sup>) mice. White and orange arrows indicated c-fos+ cells



762 were enlarged at the bottom-left of the middle and right panels to show the co-  
763 labeling with npr-1 and Sst, respectively. **(B-C)** Statistic data showed that CQ  
764 induced increase of overall c-fos+ cell number in WT mice were remained in the  
765 microglia ablation mice (**B**,  $p < 0.0001$  for naïve vs. WT + CQ,  $p = 0.0732$  for WT +  
766 CQ vs. ablation + CQ), and increase of c-fos+ percentage of Npr1+ and Sst+  
767 neurons were also remained (**C**,  $p < 0.0001$  for naïve vs. WT + CQ in both Npr1+ and  
768 Sst+ cells,  $p = 0.439$  for WT + CQ vs. ablation + CQ in Npr1+ cells,  $p = 0.296$  for WT  
769 + CQ vs. ablation + CQ in Sst+ cells).  $n = 11$  and  $15$  images for WT + CQ, and  
770 ablation + CQ group, respectively. Naïve data were equal to Fig. 3. Samples were  
771 obtained from 3 mice for each group. \*\*\*\* $p < 0.0001$ , un-paired t-test. Data were  
772 presented as mean  $\pm$  SEM.

773

774 **Figure 6.** CX3CR1, but not P2Y12 receptor deficit impaired histamine dependent  
775 itch responses. **(A)** The Scratch responses to HA in the CX3CR1 KO mice were  
776 significantly less than in the WT and P2Y12 KO mice during the 30 min observation  
777 ( $n = 12, 9$  and  $10$  for WT, CX3CR1 KO and P2Y12 KO group, respectively;  $p <$   
778  $0.0001$  for WT vs. CX3CR1 KO,  $p = 0.891$  for WT vs. P2Y12 KO). **(B)** The Scratch  
779 responses to C48/80 in the CX3CR1 KO mice were significantly less than in the WT  
780 and P2Y12 KO mice at both the early ( $p = 0.0206$  for WT vs. CX3CR1 KO,  $p = 0.572$   
781 for WT vs. P2Y12 KO) and late ( $p = 0.0012$  for WT vs. CX3CR1 KO,  $p = 0.184$  for  
782 WT vs. P2Y12 KO) stages ( $n = 11, 8$  and  $10$  for WT, CX3CR1 KO and P2Y12 KO  
783 group, respectively). **(C)** The Scratch responses to CQ in both the CX3CR1 KO and  
784 P2Y12 KO mice were similar as in WT mice at both the early ( $p = 0.174$  for WT vs.  
785 CX3CR1 KO,  $p = 0.352$  for WT vs. P2Y12 KO) and late ( $p = 0.825$  for WT vs.  
786 CX3CR1 KO,  $p = 0.865$  for WT vs. P2Y12 KO) stages ( $n = 10, 8$  and  $9$  for WT,  
787 CX3CR1 KO and P2Y12 KO group, respectively). **(D)** Intrathecal injection of  
788 microglia inhibitor, minocycline ( $50 \mu\text{g}$  in  $5 \mu\text{l}$  ACSF) or CX3CR1 antagonist, JMS-17-  
789  $2$  ( $10 \mu\text{M}$  in ACSF,  $5 \mu\text{l}$ ) to WT mice significantly reduced the late-stage scratch  
790 responses to C48/80 ( $n = 8$  for vehicle,  $n = 9$  for minocycline,  $n = 7$  for JMS-17-2;  $p =$   
791  $0.0039$  for minocycline vs. vehicle,  $p = 0.015$  for JMS-17-2 vs. vehicle). **(E)**  
792 Intrathecal injection of microglia inhibitor, minocycline ( $50 \mu\text{g}$  in  $5 \mu\text{l}$  ACSF), but not  
793 CX3CR1 antagonist, JMS-17-2 ( $10 \mu\text{M}$  in ACSF,  $5 \mu\text{l}$ ) to WT mice significantly  
794 reduced the late-stage scratch responses to CQ ( $n = 8$  for vehicle,  $n = 8$  for  
795 minocycline,  $n = 8$  for JMS-17-2;  $p = 0.00071$  for minocycline vs. vehicle,  $p = 0.873$   
796 for JMS-17-2 vs. vehicle). \* $p < 0.05$ , \*\* $p < 0.01$ , \*\*\* $p < 0.001$ , \*\*\*\* $p < 0.0001$ , un-  
797 paired t-test. Data were presented as mean  $\pm$  SEM.

798

799 **Figure 7.** CX3CL1 signal from DRG promoted the primary histamine dependent itch  
800 signal transmission via CX3CR1 receptors. **(A-B)** HA induced increase of overall c-  
801 fos+ cell number in WT mice were greatly reduced in the CX3CR1 KO mice ( $p <$   
802  $0.0001$ ), and the increase of c-fos+ percentage of Npr1+ ( $p = 0.00014$ ) and Sst+ ( $p =$   
803  $0.0049$ ) cells were also significantly reduced ( $n = 16$  for WT,  $n = 14$  for CX3CR1 KO).  
804 **(C-D)** C48/80 induced increase of overall c-fos+ cell number in WT mice were greatly  
805 reduced in the CX3CR1 KO mice ( $p < 0.0001$ ), and the increase of c-fos+ percentage

806 of Npr1+ ( $p = 0.0143$ ), but not Sst+ ( $p = 0.419$ ) cells were also significantly reduced  
807 ( $n = 13$  for WT,  $n = 14$  for CX3CR1 KO). **(E-F)** CQ induced increase of overall c-fos+  
808 cell number in WT mice were remained in the CX3CR1 KO mice ( $p = 0.137$ ), and the  
809 increase of c-fos+ percentage of Npr1+ ( $p = 0.117$ ) and Sst+ ( $p = 0.155$ ) cells were  
810 also remained ( $n = 11$  for WT,  $n = 13$  for CX3CR1 KO). **(G)** Representative  
811 immunostaining images showed CX3CL1 protein expression in DRG neurons of  
812 naïve WT mice. **(H)** Representative RNAscope images showed Cx3cl1 mRNA  
813 expression in the DRG. Cx3cl1 mRNA was not detectable in the DRG of naïve ( $n =$   
814 10 image samples) WT mice nor CQ ( $n = 14$  image samples) treated (90 min post  
815 CQ) WT mice, but was seen in the DRG of C48/80 treated (90 min post C48/80) WT  
816 mice ( $n = 11$  of 14 image samples). Samples were obtained from 3 mice for each  
817 group. \* $p < 0.05$ , \*\* $p < 0.01$ , \*\*\* $p < 0.001$ , \*\*\*\* $p < 0.0001$ , un-paired t-test. Data were  
818 presented as mean  $\pm$  SEM.

819

820

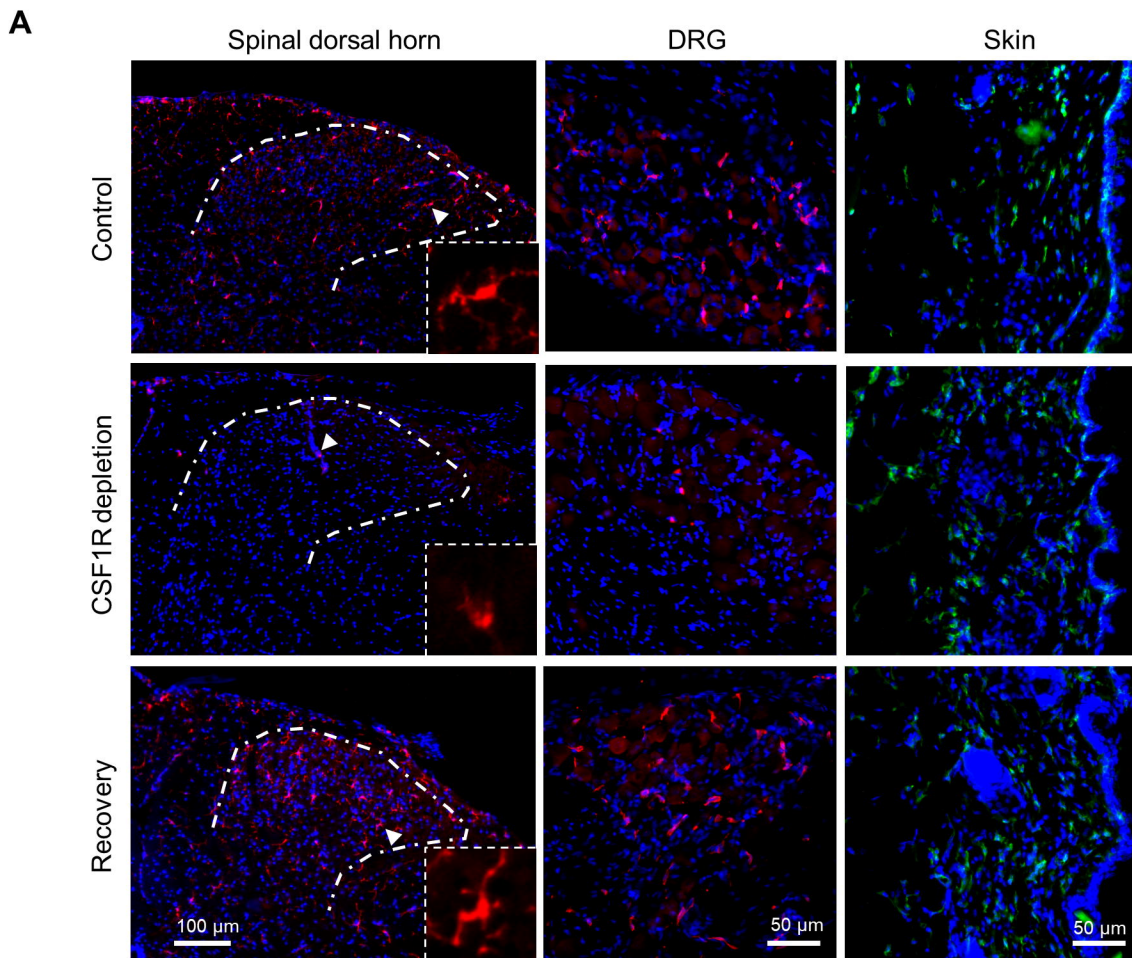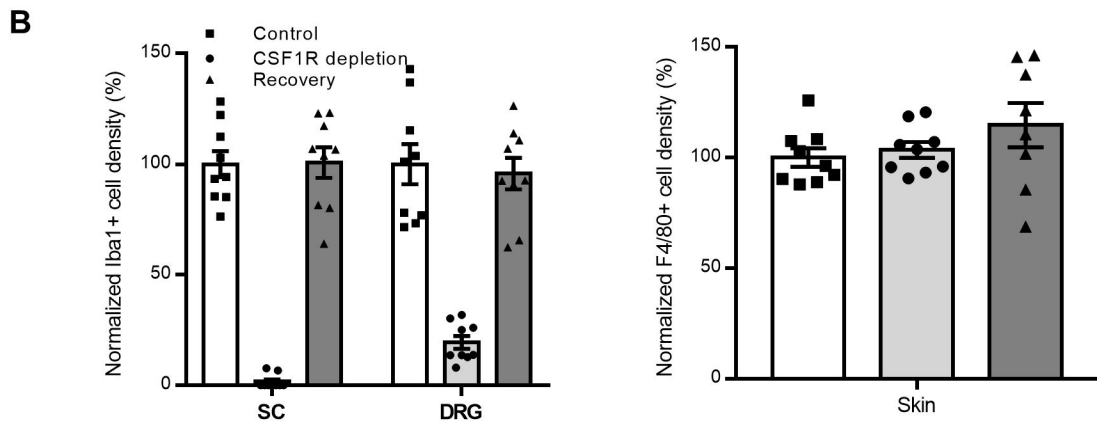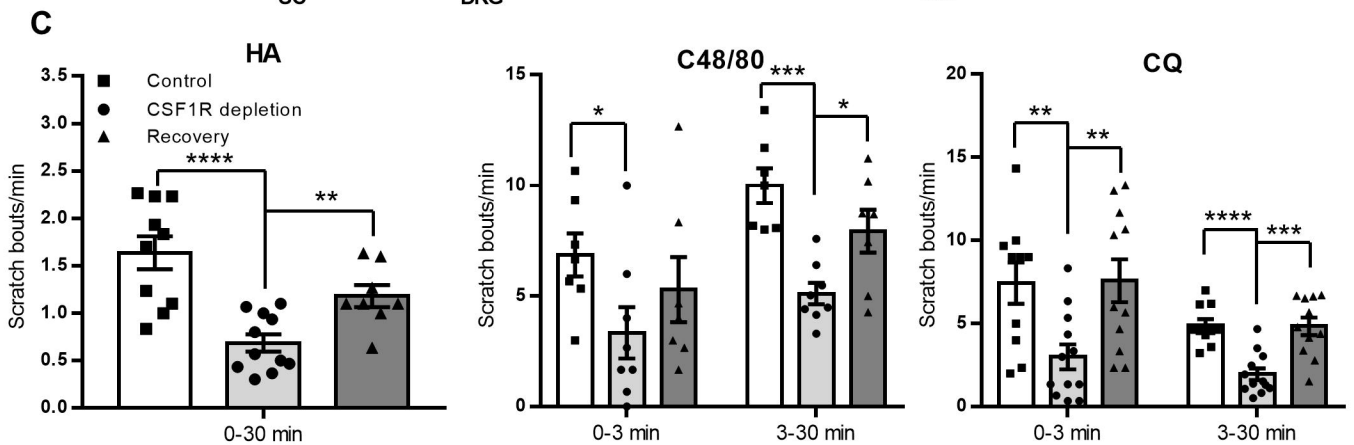

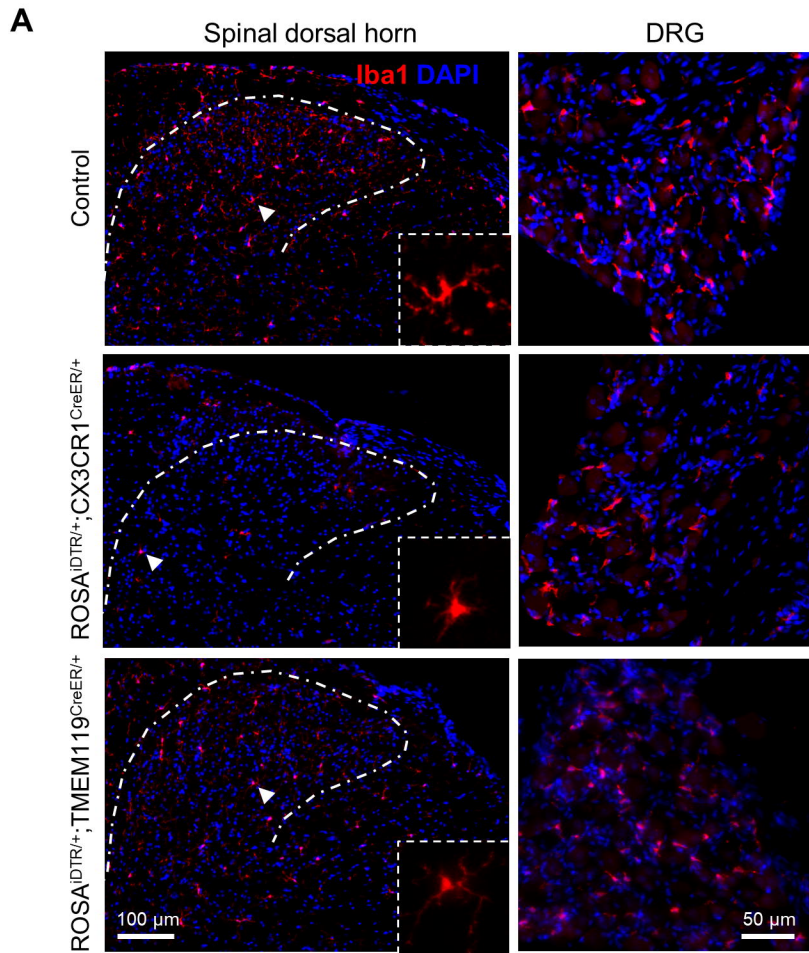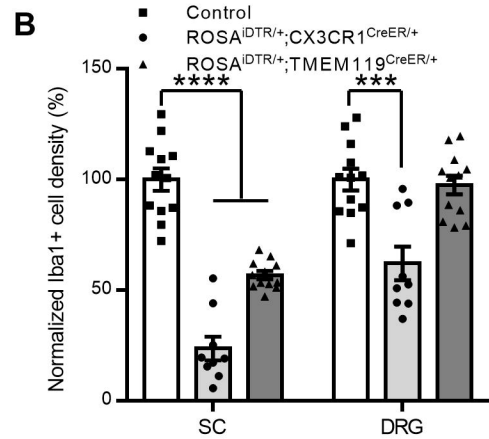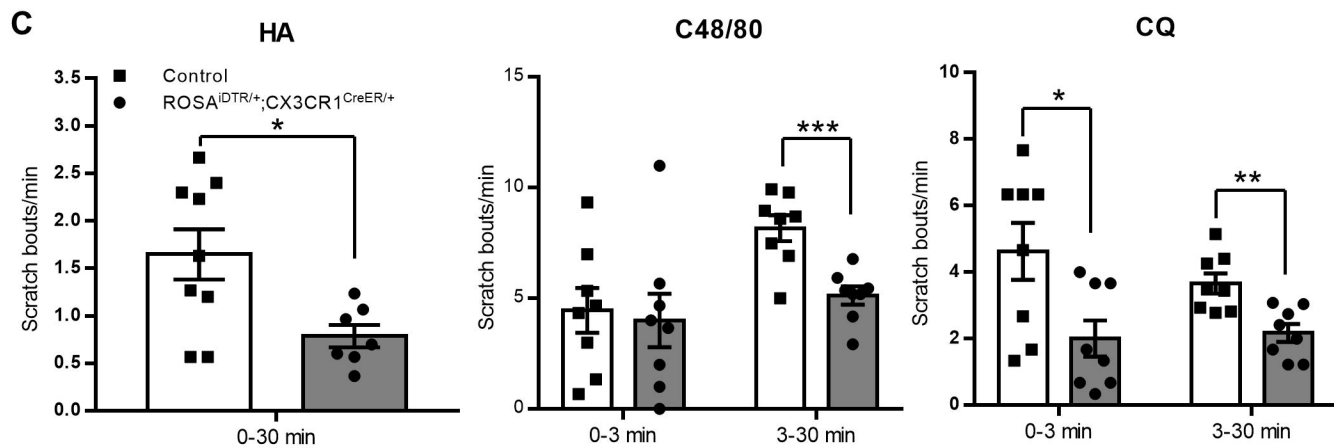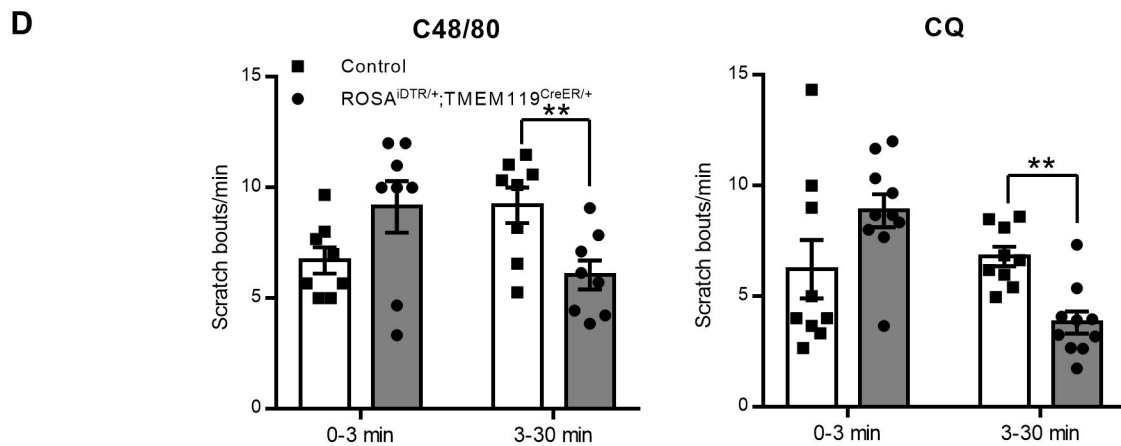

**A**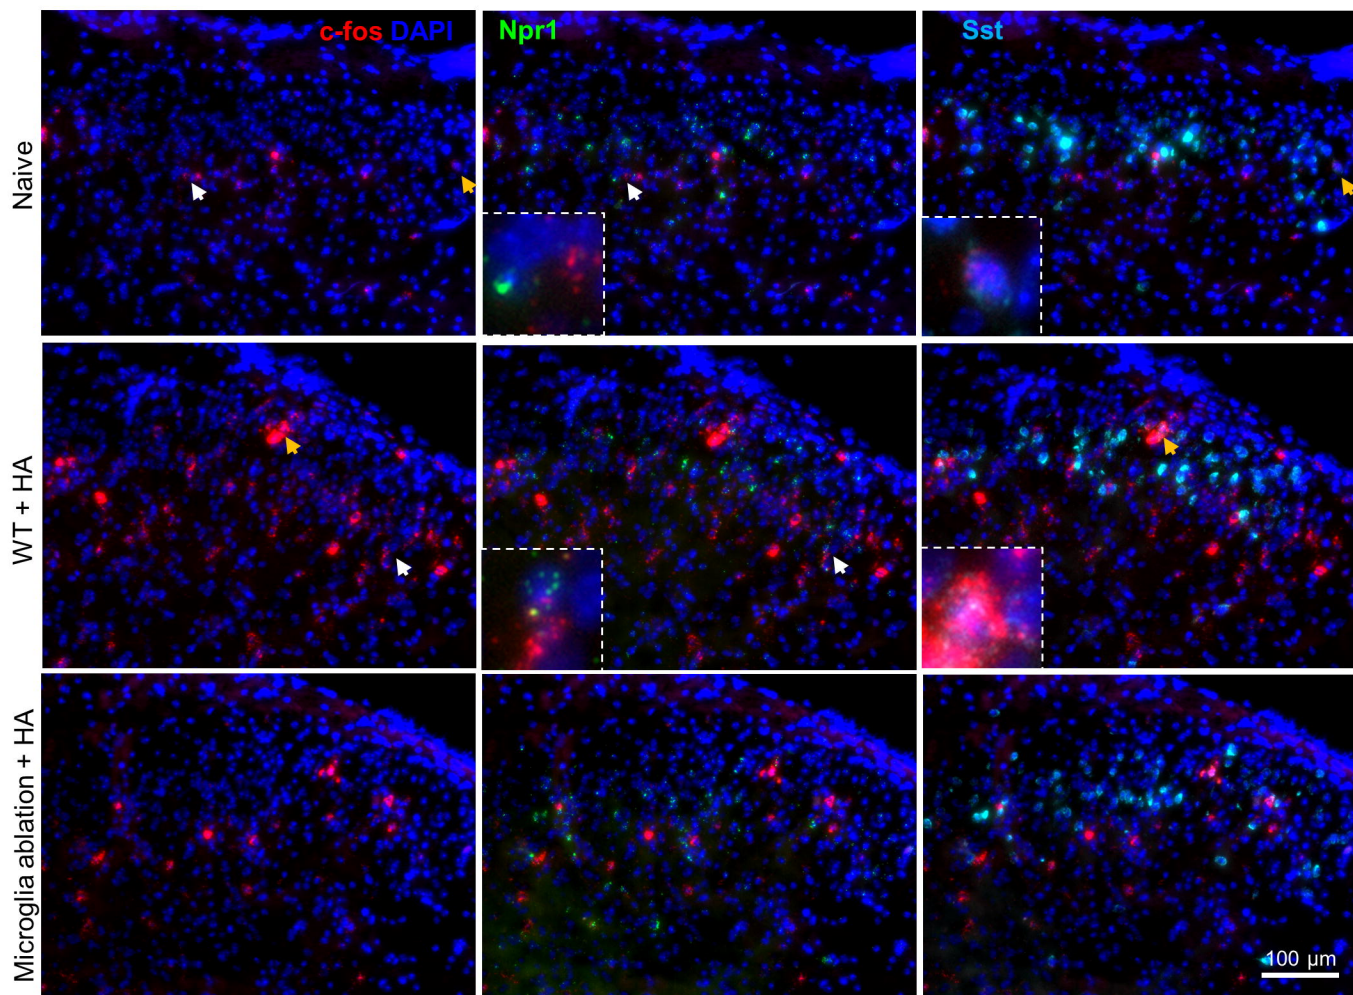**B**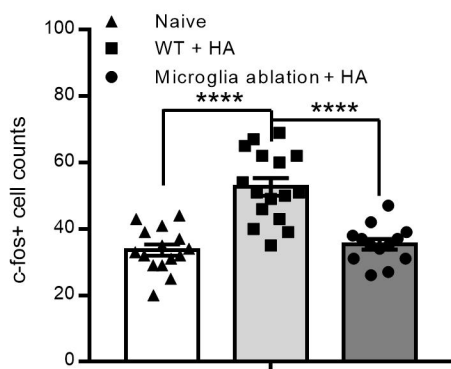**C**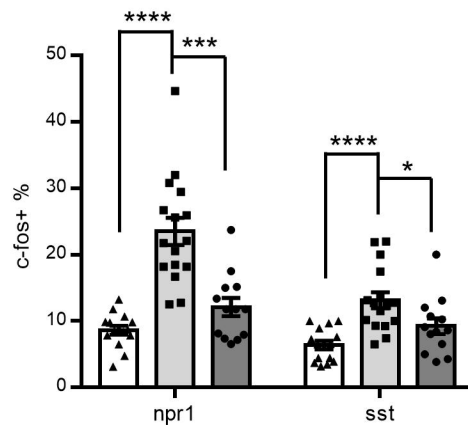

**A**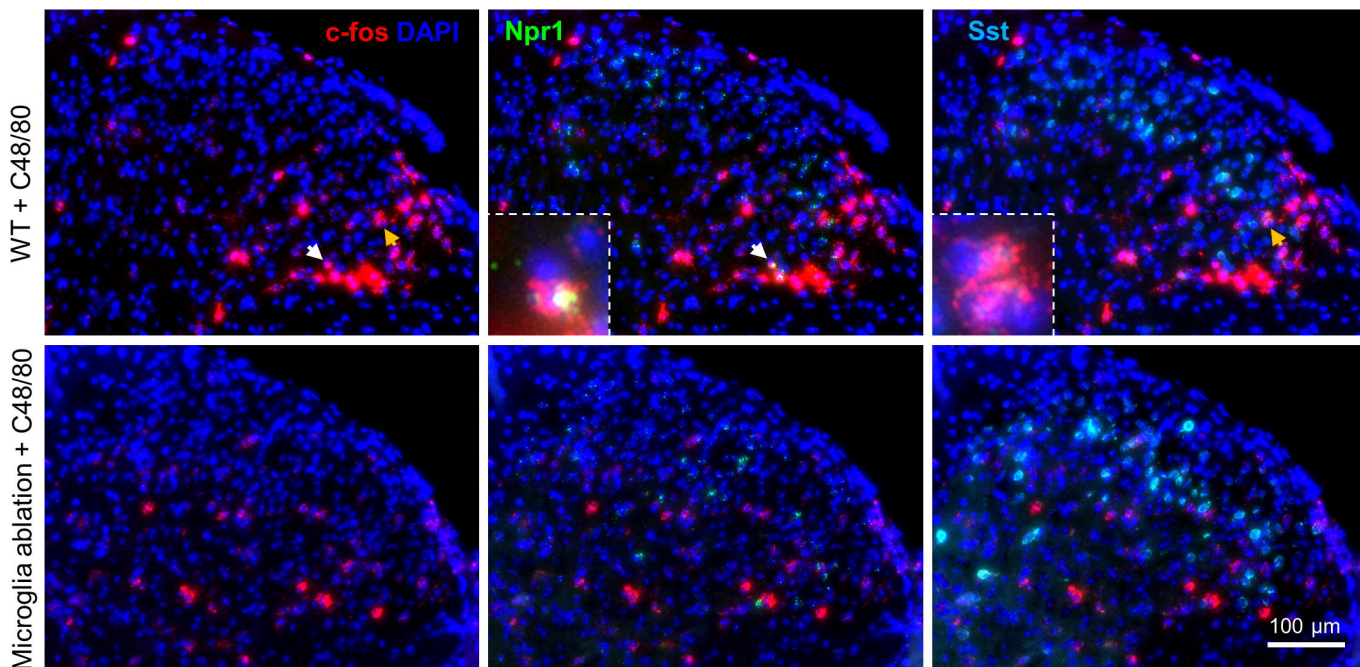**B**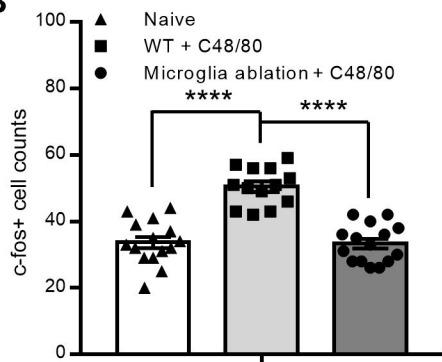**C**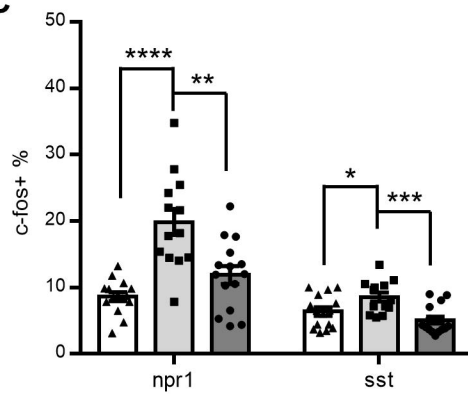

**A**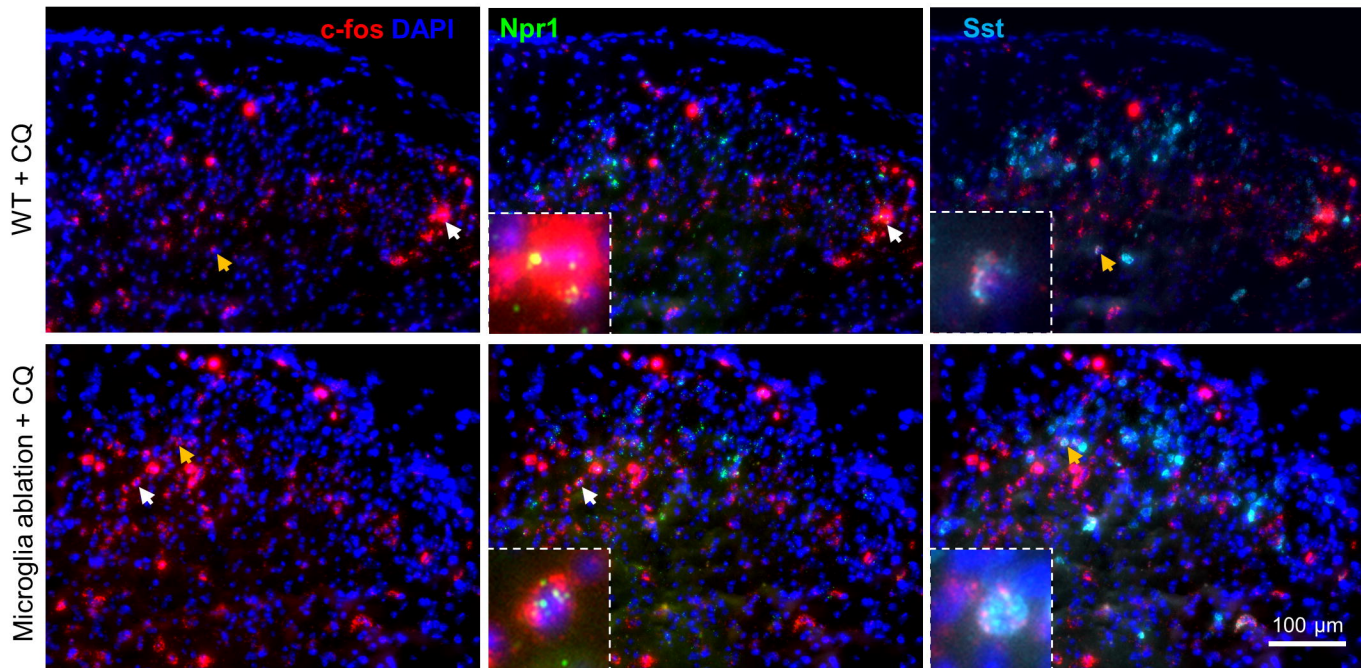**B**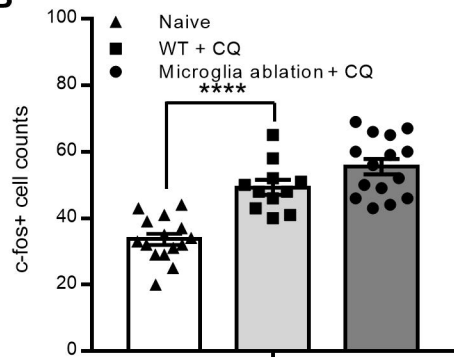**C**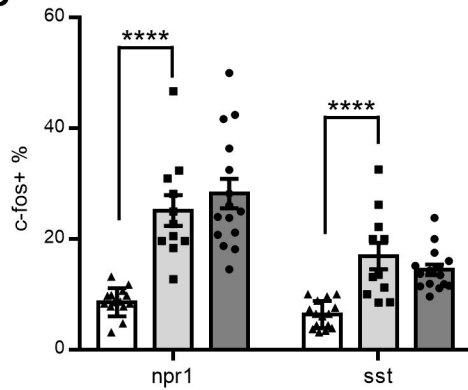

**A**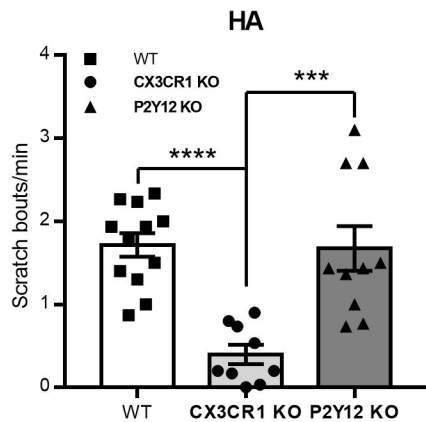**B**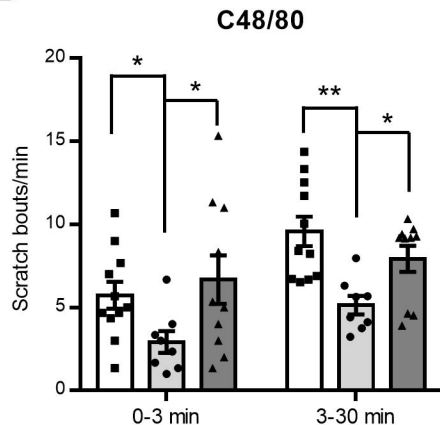**C**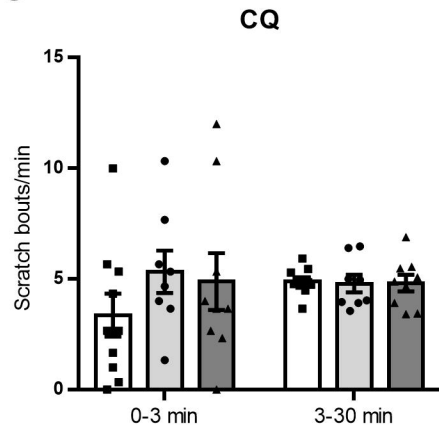**D**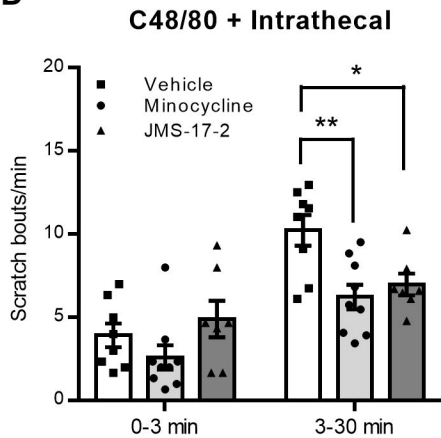**E**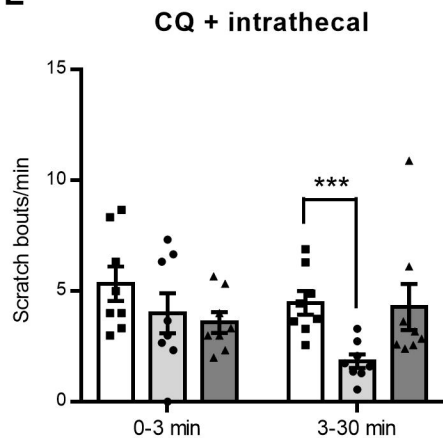



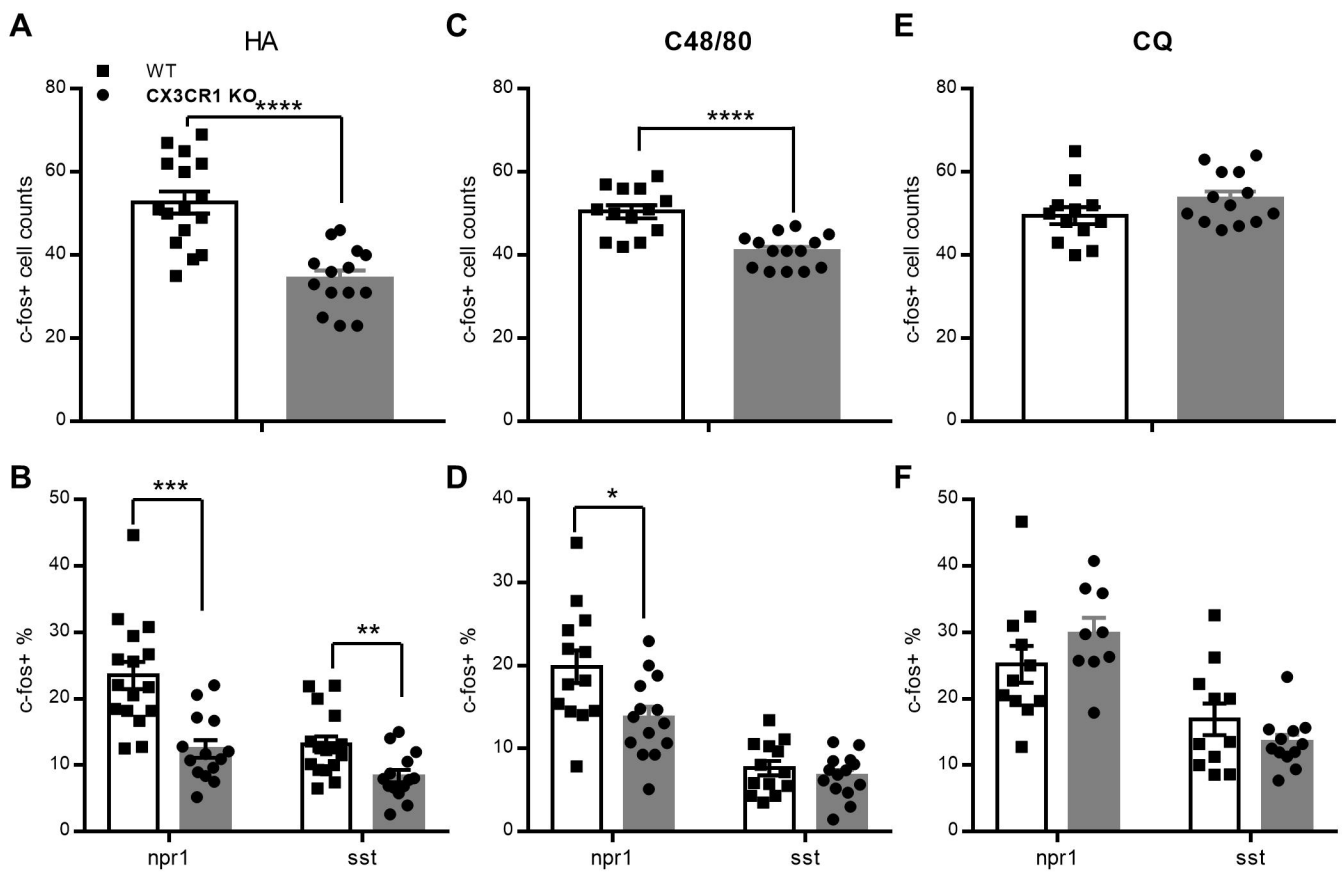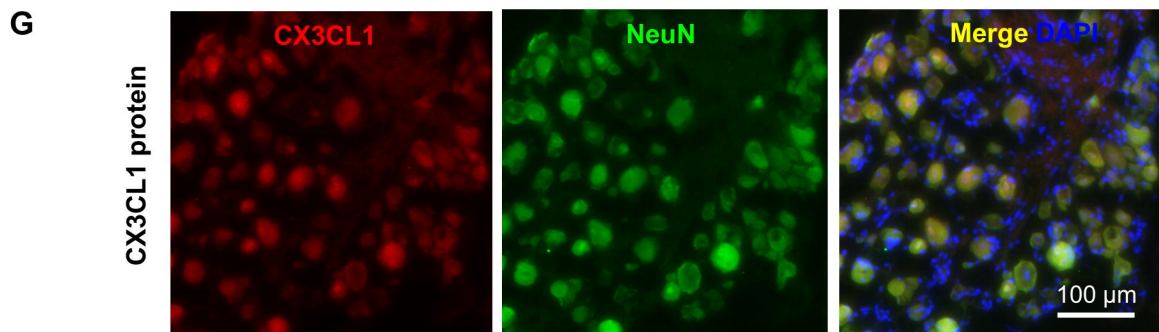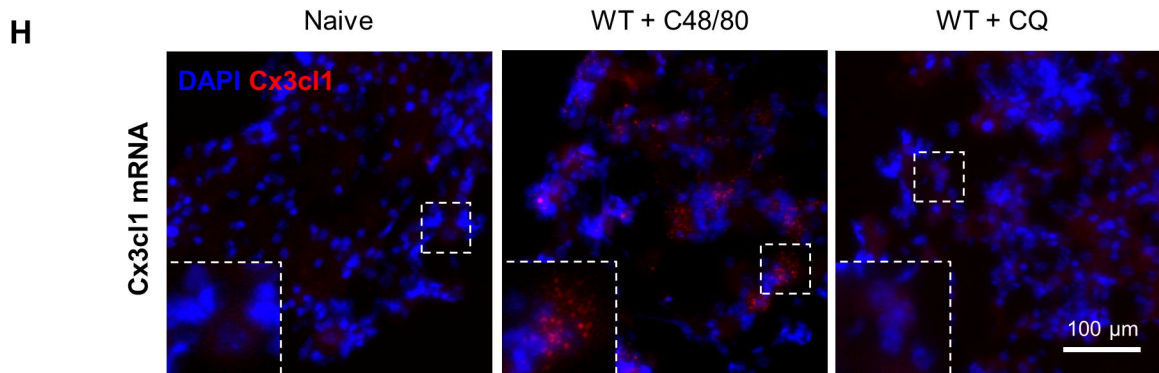

Source: https://www.biorxiv.org/content/10.1101/2022.09.23.498040v1.full.pdf
